# The multi-scale architecture of mammalian sperm flagella and implications for ciliary motility

Miguel Ricardo Leung<sup>1,2</sup>, Marc C. Roelofs<sup>1</sup>, Ravi Teja Ravi<sup>1</sup>, Paula Maitan<sup>3,4</sup>, Min Zhang<sup>5</sup>, Heiko Henning<sup>3</sup>, Elizabeth G. Bromfield<sup>5,6</sup>, Stuart C. Howes<sup>1</sup>, Bart M. Gadella<sup>5</sup>, Hermes Bloomfield-Gadêlha<sup>7</sup>, and Tzviya Zeev-Ben-Mordehai<sup>1,2,\*</sup>

<sup>1</sup>Cryo-Electron Microscopy, Bijvoet Center for Biomolecular Research, Utrecht University, 3584 CH Utrecht, The Netherlands

<sup>2</sup>The Division of Structural Biology, Wellcome Centre for Human Genetics, The University of Oxford, Oxford OX3 7BN, United Kingdom

<sup>3</sup>Department of Clinical Sciences, Faculty of Veterinary Medicine, Utrecht University 3584 CM Utrecht, The Netherlands

<sup>4</sup>Veterinary Department, Universidade Federal de Viçosa, 36570-900 Viçosa, Minas Gerais, Brazil

<sup>5</sup>Department of Farm & Animal Health and Biomolecular Health Sciences, Faculty of Veterinary Medicine, Utrecht University, 3584 CM Utrecht, The Netherlands

<sup>6</sup>Priority Research Centre for Reproductive Science, Faculty of Science, The University of Newcastle, Callaghan, Australia, 2308

<sup>7</sup>Department of Engineering Mathematics and Bristol Robotics Laboratory, University of Bristol, BS8 1UB Bristol, United Kingdom

\*correspondence to: z.zeev@uu.nl

## Summary

Motile cilia are molecular machines used by a myriad of eukaryotic cells to swim through fluid environments. However, available molecular structures represent only a handful of cell types, limiting our understanding of how cilia are modified to support motility in diverse media. Here, we use cryo-focused ion beam milling-enabled cryo-electron tomography to image sperm flagella from three mammalian species. We resolve in-cell structures of centrioles, axonemal doublets, central pair apparatus, and endpiece singlets, revealing novel protofilament-bridging microtubule inner proteins throughout the flagellum. We present native structures of the flagellar base, which is crucial for shaping the flagellar beat. We show that outer dense fibers are directly coupled to microtubule doublets in the principal piece but not in the midpiece. Thus, mammalian sperm flagella are ornamented across scales, from protofilament-bracing structures reinforcing microtubules at the nano-scale to accessory structures that impose micron-scale asymmetries on the entire assembly. Our structures provide vital foundations for linking molecular structure to ciliary motility and evolution.

sperm | motility | cilia | centrioles | axoneme | microtubules | cryo-electron tomography | cryo-FIB milling | segmentation | subtomogram averaging

## Introduction

Cilia, also called flagella, are evolutionarily ancient organelles used by a menagerie of eukaryotic cell types and organisms to propel themselves through fluid environments (Mitchell, 2017; Wan, 2018). These intricate molecular machines are paragons of self-organization built from a bewildering array of active and passive structural elements that, together, are able to spontaneously generate oscillatory wave-like motion (Gaffney et al., 2011). The basic architecture of motile cilia is conserved across broad swaths of the eukaryotic tree, providing information on the minimal structures needed for spontaneous undulation (Brokaw, 2009). However, because they operate in a wide range of environments, cilia from different cell types generate different waveforms (Khan and Scholey, 2018) that are further modulated by fluid viscosity (Smith et al., 2009).

The motile cilium is a continuous assembly of compound microtubules (Ishikawa, 2017). The base of the cilium is the centriole or basal body, which is typically a cylinder of

triplet microtubules. The centriole transitions into the axoneme, which consists of nine doublet microtubules arrayed around a central pair of singlet microtubules. Axonemal microtubules anchor hundreds of dynein motors and accessory proteins to power and regulate movement. Axoneme structure has been studied extensively by cryo-electron tomography (cryo-ET) in *Chlamydomonas*, *Tetrahymena*, and sea urchin sperm (Nicastro et al., 2006, 2011; Owa et al., 2019; Pigino et al., 2012). Recent studies have begun to shed light on species- and cell type-specific specializations (Greenan et al., 2020; Imhof et al., 2019; Lin et al., 2014a; Yamaguchi et al., 2018), motivating efforts to expand the pantheon of organisms and cell types used in axoneme research.

Perhaps the most striking example of ciliary diversity across species is in sperm, which are highly specialized for a defined function – to find and fuse with the egg. Sperm consist of a head, which contains the genetic payload, and a tail, which is a modified motile cilium. Despite their streamlined structure, sperm are simultaneously the most diverse eukaryotic cell type (Gage, 2012; Lüpold and Pitnick, 2018), reflecting the sheer range of reproductive modes and fertilization arenas, from watery media for marine invertebrates and freshwater species to the viscous fluids of the female reproductive tract for mammals. Because motility is crucial to sperm function, the natural variation of sperm form thus presents a unique opportunity to understand the structural diversification of motile cilia.

Mammalian sperm flagella are characterized by accessory structures that surround and dwarf the axoneme (Fawcett, 1975), unlike marine invertebrates whose sperm tails consist essentially of the axoneme (Fawcett, 1970). In mammalian sperm, axonemal doublets are associated with filamentous cytoskeletal elements called outer dense fibers (ODFs) for most of their lengths. The ODFs are further surrounded by a sheath of mitochondria in the midpiece and by a reticular structure called the fibrous sheath in the principal piece. These accessory structures are proposed to stabilize beating of the long flagella of mammalian sperm (Lindemann, 1996; Lindemann and Lesich, 2016). The accessory structures may also facilitate movement through viscous media by suppressing buckling instabilities that would otherwise cause sperm to swim in circles (Gadêlha and Gaffney, 2019). Indeed, many cases of male infertility are linked to defects in these acces-

sory elements (Haidl et al., 1991; Serres et al., 1986; Zhao et al., 2018). However, we still do not fully understand how these accessory structures modulate the flagellar beat since there is very little structural information on how they interact with the axoneme proper.

Another distinguishing feature of mammalian sperm flagella is that they are not anchored by a basal body (Avidor-Reiss, 2018). Instead, the base of the mammalian sperm flagellum is surrounded by a large cytoskeletal scaffold called the connecting piece. The isolated bovine sperm connecting piece was characterized by cryo-ET, revealing a complex asymmetric assembly (Ounjai et al., 2012). However, the purification process resulted in loss of the centrioles. Thus, there is still a paucity of structural information on the flagellar base in intact cells and on how it varies across species that often have very different head shapes.

Sperm have two centrioles that are located in the neck, where the nucleus attaches to the flagellum. The centriole closer to the nucleus is referred to as the proximal centriole (PC) and the one at the base of the flagellum the distal centriole (DC). During spermiogenesis in mammals, the DC is remodeled to the point that it no longer resembles a canonical centriole. This was thought to represent a process of degeneration (Manandhar et al., 2000), but recent work showed that the DC is in fact a functional centriole that participates in orchestrating the first zygotic division (Fishman et al., 2018). Such drastic deviations from canonical centriole architecture have not been investigated in detail.

Here, we combine cryo-focused ion beam (cryo-FIB) milling-enabled cryo-ET (Marko et al., 2007; Rigort et al., 2012) with subtomogram averaging to image mature sperm from three mammalian species – the pig (*Sus scrofa*), the horse (*Equus caballus*), and the mouse (*Mus musculus*) – that differ in terms of gross morphology, motility, and metabolism. We leverage the uniquely multiscale capabilities of cryo-ET to define the molecular architecture of microtubule-based assemblies and their critical interactions with accessory structures. We take advantage of the highly streamlined shape of sperm in order to define how these structures and relationships change throughout the flagellum.

We define the architecture of the flagellar base and show that ODFs are anchored through a large, asymmetric chamber around the centrioles. We show that ODFs are directly coupled to axonemal microtubules in the principal piece, but not in the midpiece. We find that mammalian sperm microtubules are additionally decorated throughout by protofilament-bridging microtubule inner protein densities. Thus, mammalian sperm flagella are modified across scales – from large accessory structures that increase the effective size and rigidity of the entire assembly to extensive microtubule inner proteins that likely reinforce the microtubules themselves. We further discuss the implications of this multiscale architecture for ciliary motility.

## Results

**The base of the flagellum is anchored through a large, asymmetric chamber around the centrioles.** The neck

region containing the PC and DC is too thick (~600-700 nm) for direct imaging by cryo-ET, so in order to image sperm centrioles in their native subcellular milieu, we used cryo-FIB milling to generate thin lamellae suitable for high-resolution imaging (Fig. 1). Cryo-ET of lamellae containing the PC confirmed that it is indeed composed of triplet microtubules in pig and in horse sperm (Fig. 1a-b). Unexpectedly, we found that triplets of the pig sperm PC are not all the same length (Fig. 1a, S1a). Shorter triplets are grouped on one side of the centriole, giving the PC a striking dorsoventral asymmetry (Fig. S1a). Consistent with previous reports that the PC degenerates in rodents (Manandhar et al., 1998; Woolley and Fawcett, 1973), the PC was not prominent in mouse sperm. However, cryo-ET showed unequivocally that some centriolar microtubules remain (Fig. 1c), demonstrating that degeneration is incomplete. We observed complete triplets as well as triplets in various stages of degeneration, including triplets in which only the B-tubule had degraded (Fig. 1c').

We determined the *in situ* structure of the pig sperm PC by subtomogram averaging (Fig. 1d). While the overall structure of the PC triplet is similar to other centriole structures (Greenan et al., 2018, 2020; Guennec et al., 2020; Guichard et al., 2013; Li et al., 2012), it differs in terms of the microtubule inner protein densities (MIPs) (Fig. S1b). We observed nine MIPs, six in the A-tubule, one in the B-tubule, and two in the C-tubule (Fig. (Fig. S1c). In the A-tubule most of the MIPs are unique, including MIP2 (yellow) that binds to protofilament A12, MIP3 (orange) bridging protofilaments A13 and A1, MIP4 (red) that binds to A2, MIP5 (purple) that binds to A5, and MIP6 (blue) bridging A6 and A7. MIP1 (green), a prominent MIP associated with protofilament A9, was also reported in centrioles isolated from CHO cells (Greenan et al., 2018) and in basal bodies from bovine respiratory epithelia (Greenan et al., 2020). Protofilaments A9 and A10 are proposed to be the location of the seam (Ichikawa et al., 2017), which suggests that MIP1 is a highly-conserved seam-stabilizing or seam-recognizing structure.

In the B-tubule, we observed a large helical MIP7 (magenta) bridging protofilaments B3-9. We observed two groups of unique MIPs in the C-tubule, MIP8 (light pink) associated with C2-C4 and MIP9 (pink) with C5-C7. The inner junctions between A- and B-tubules (cyan) and between B- and C-tubules (turquoise) are non-tubulin proteins that repeat every 8 nm and are staggered relative to each other when viewed from the luminal side of the triplet. We resolved density for the A-C linker (gold), which is associated with protofilaments C9 and C10 (Fig. 1e).

The B- and C-tubule MIPs we observed are not present in other centriole structures. However, helical MIPs have been observed in the transition zone of bovine respiratory cilia (Greenan et al., 2020). Unlike other mammalian centriole structures, we do not observe MIPs that bridge B1-B2 or C1-C2 (Fig. S1b). It is difficult to tell whether these differences in MIP patterns are due to differences in cell type or species. As this is the first *in situ* structure of any mammalian centriole, these differences may also be because pre-

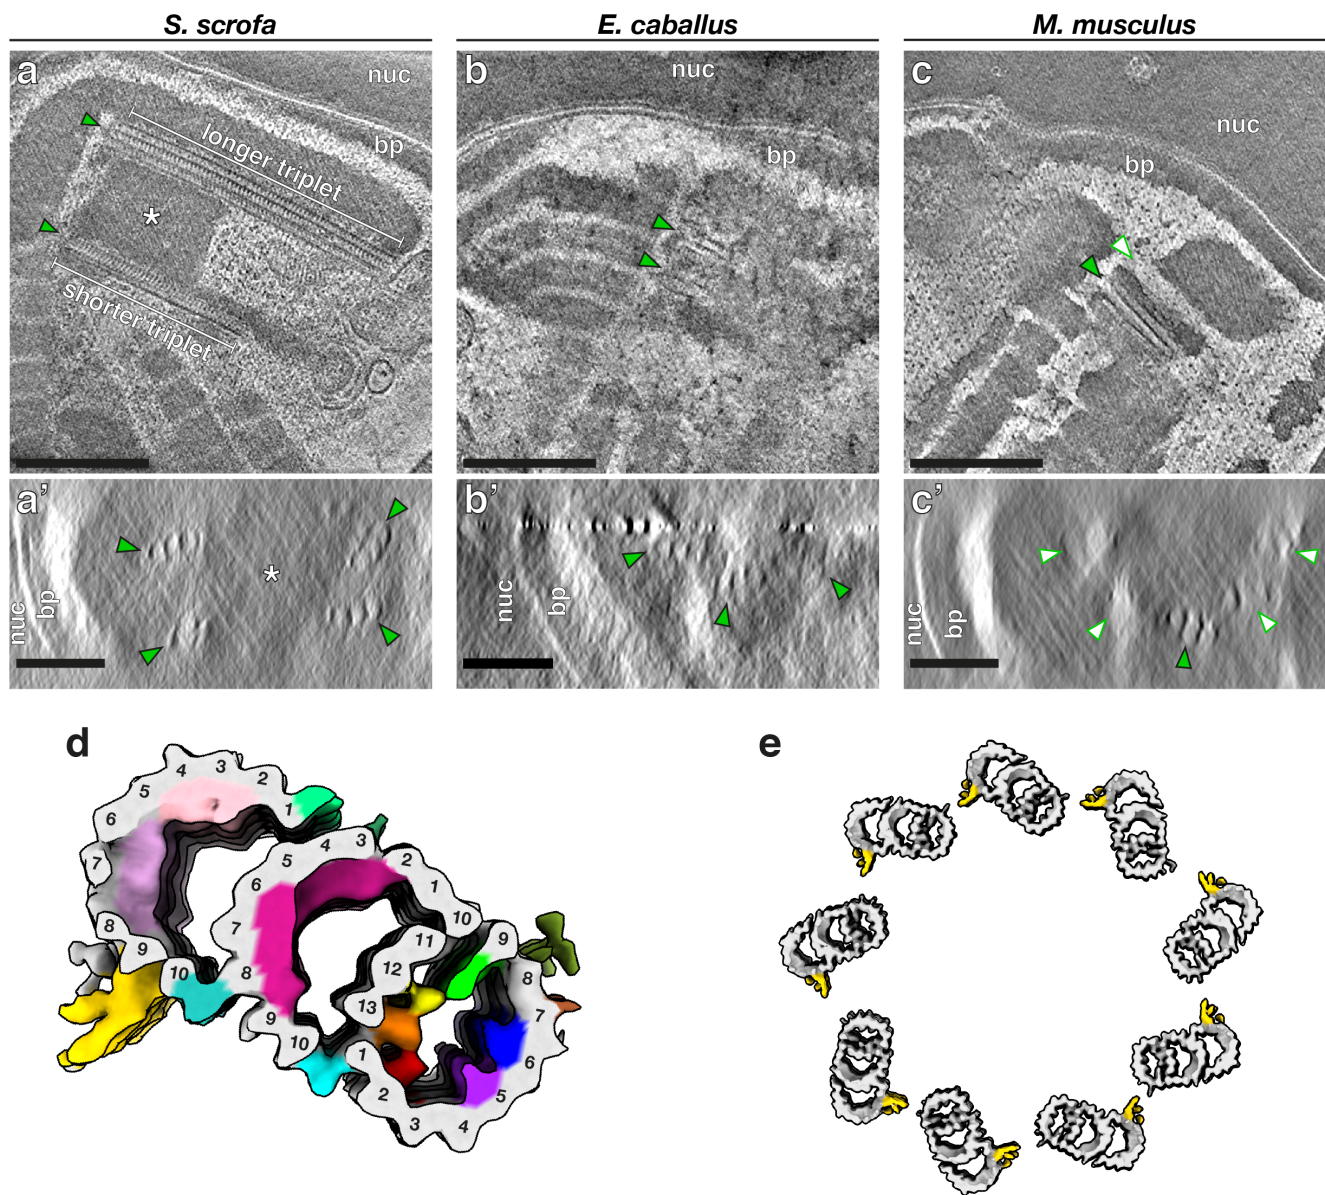

**Fig. 1. The proximal centriole (PC) in mammalian sperm is asymmetric and contains novel microtubule inner proteins.** Tomographic slices through cryo-FIB milled lamellae of pig (a), horse (b), and mouse (c) sperm. Transverse slices (a'-c') show complete triplets in the pig (a') and the horse (b'), but not in the mouse (c'). Complete triplets are indicated by green arrowheads with black outlines, while degenerated triplets are indicated by white arrowheads with green outlines. (d) *In situ* structure of the pig sperm PC with the tubulin backbone in grey and microtubule inner protein densities colored individually. (e) Reconstruction of the pig sperm PC with the A-C linker colored in yellow. **Labels:** nuc - nucleus, bp - baseplate. **Scale bars:** (a,b,c) 250 nm; (a',b',c') 100 nm.

199 vious structures were of isolated centrioles. Nonetheless, it 211  
 200 is clear that there is great diversity in how core centriolar mi- 212  
 201 crotubules are accessorized, which raises questions about the 213  
 202 functions of these MIPs. 214

203 We next determined the organization of the atypical DC by 215  
 204 tracing microtubules through Volta phase plate (VPP) (Danev 216  
 205 et al., 2014) cryo-tomograms of whole sperm (Fig. 2). The 217  
 206 DC consists of doublet microtubules, with a pair of singlets 218  
 207 extending through the lumen (Fig. 2a-f). In pig and in horse 219  
 208 sperm (Fig. 2a-d), doublets extend almost as far proximally 220  
 209 as the central pair. In a further departure from canonical 221  
 210 centriole structure, DC doublets are splayed open and ar- 222

ranged asymmetrically around the singlets. The central singlets themselves are spaced inconsistently, suggesting that they lack the projections characteristic of the central pair apparatus (CPA). Mouse sperm doublets are not splayed, but they also have a pair of singlets extending beyond the axoneme (Fig. 2e-f).

To more precisely define the DC-to-axoneme transition, we imaged cryo-FIB-milled sperm (Fig. 2g-i). We directly observed this transition *in situ* in pig sperm, defined by the appearance of axonemal accessory proteins such as the radial spokes (RSs) and the projections of the CPA (Fig. 2h). The onset of the axoneme coincides with a change in micro-

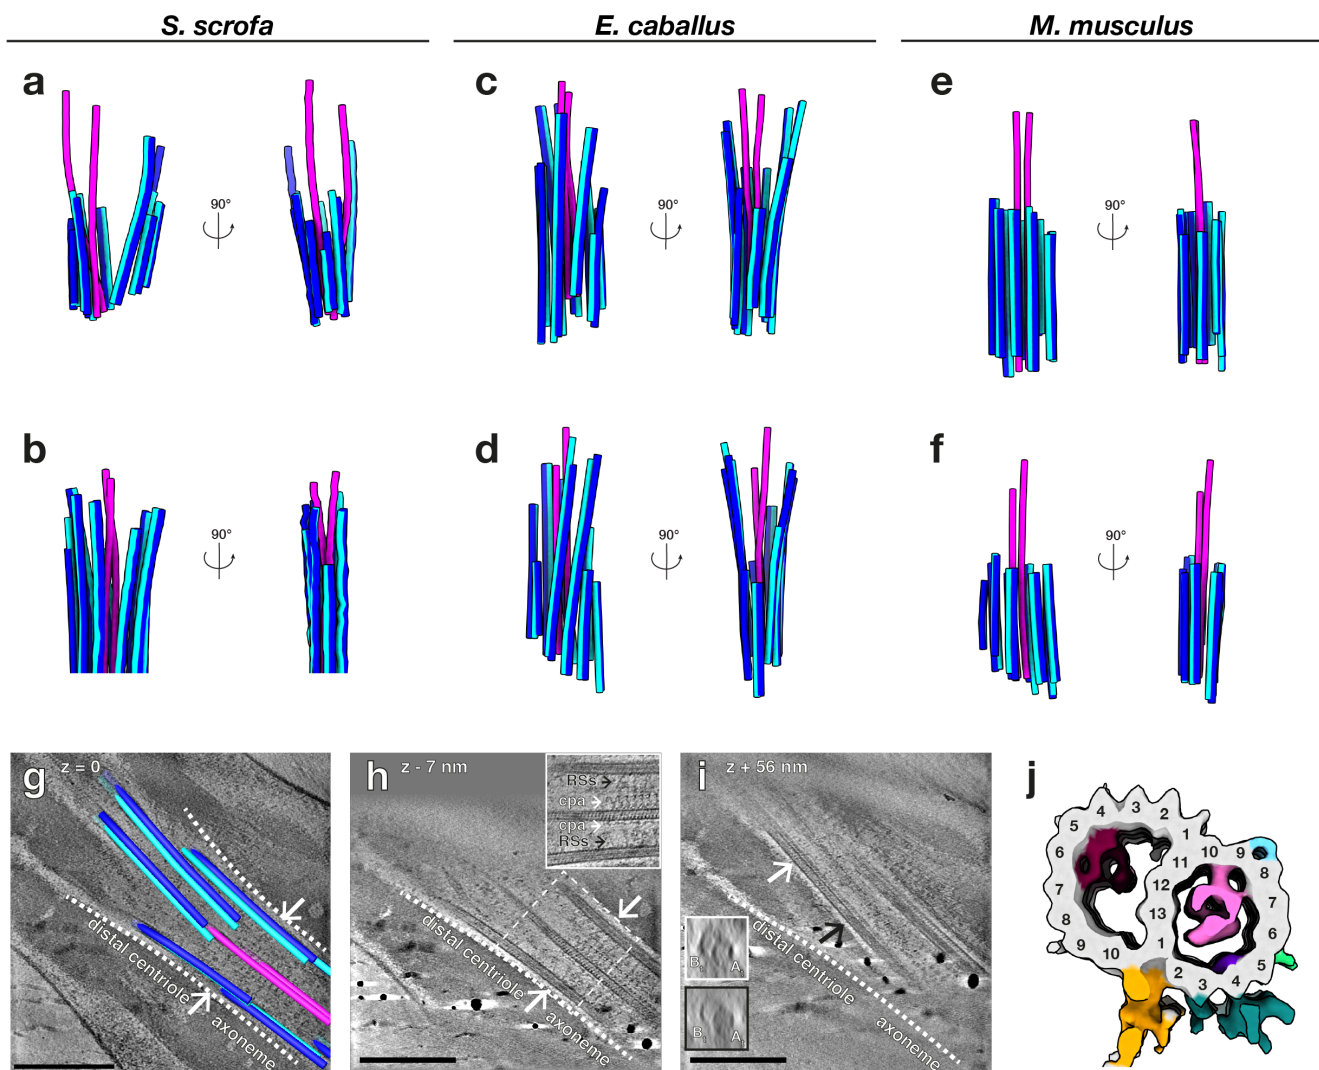

**Fig. 2. The distal centriole (DC) in mammalian sperm is composed of doublet microtubules arrayed asymmetrically around a pair of singlet microtubules.** (a-f) Microtubules in the DC of pig (a,b), horse (c,d), and mouse (e,f) sperm traced from Volta phase plate cryo-tomograms of intact sperm. (g-i) Tomographic slices through cryo-FIB milled lamellae of the DC-to-axoneme transition in pig sperm show how the change in geometry (g) coincides with the appearance of axoneme accessory structures (h) and with density in the A-tubule (i). (j) *In situ* structure of the pig sperm DC with the tubulin backbone in grey and microtubule inner protein densities colored individually. **Labels:** RSs - radial spokes, cpa - central pair apparatus,  $A_t$  - A-tubule,  $B_t$  - B-tubule. **Scale bars:** 250 nm.

223 tubule geometry (Fig. 2g), suggesting that the splayed-open  
 224 doublets are indeed characteristic of the DC. The transition  
 225 zone also coincides with an increase in density in the A-  
 226 tubule (Fig. 2i), suggesting that binding of axonemal acces-  
 227 sory structures is related to the regulated binding of A-tubule  
 228 MIPs. We then determined the structure of DC doublets, re-  
 229 vealing the presence of MIPs distinct from those in the PC  
 230 (Fig. 2j).

231 The flagellar waveform depends greatly on the properties  
 232 of the base (Riedel-Kruse and Hilfinger, 2007), but there is  
 233 very little information on how this region is organized in  
 234 three dimensions in any cell type. In order to capture the full  
 235 three-dimensional complexity of the flagellar base, we took  
 236 advantage of enhanced contrast provided by the VPP, which  
 237 allowed us to trace microtubules while retaining the con-  
 238 text of the surrounding connecting piece (Fig. 3a-c). Semi-

automated neural-network-based segmentation (Chen et al.,  
 2017) revealed that the connecting piece forms a large cham-  
 ber enclosing the sperm centrioles. Although precise dimen-  
 sions and shapes of the connecting piece differ across species  
 (Fig. 3d-f), its general architecture appears to be conserved  
 across mammalian species.

The proximal region of the connecting piece consists of  
 striated columns (SCs), called such because of their banded  
 appearance. Following the numbering scheme laid out in  
 (Ounjai et al., 2012), we found that the SCs follow a con-  
 served pattern of grouping and splitting. The proximal con-  
 necting piece can be grossly divided into left and right re-  
 gions. The right region forms the proximal centriolar vault  
 where columns 8, 9, 1, 2, and 3 merge whereas the left re-  
 gion comprises columns 4, 5, 6, and 7 (Fig. 3d-f, panels  
 iv). The columns gradually separate, eventually splitting into

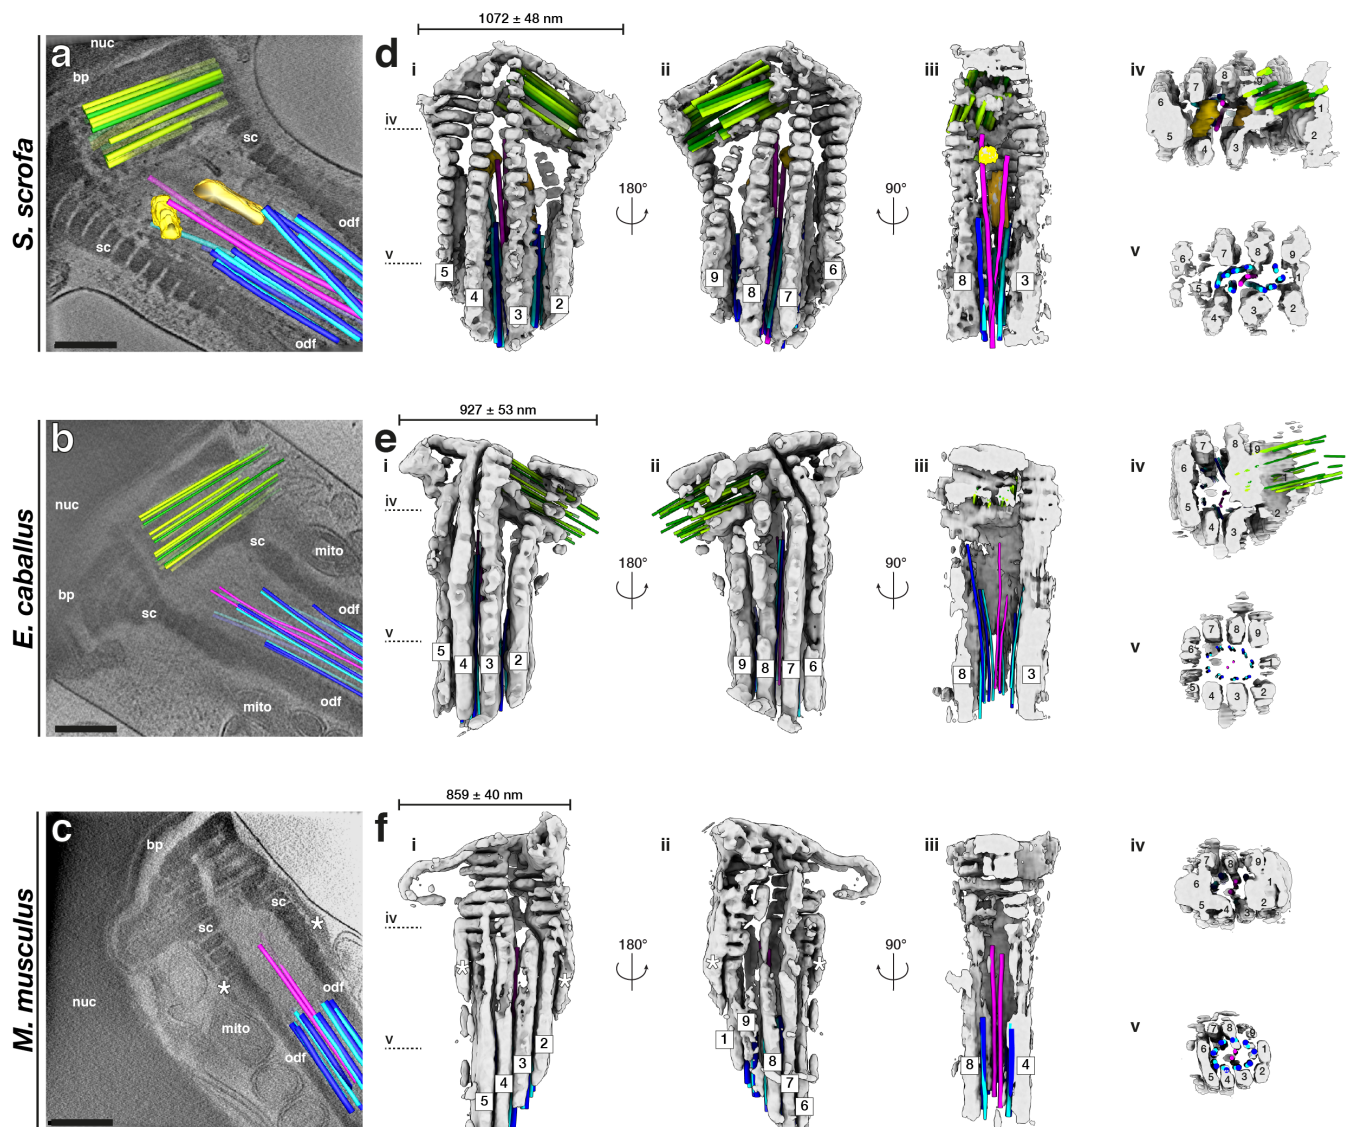

**Fig. 3. The connecting piece forms a large, asymmetric chamber around the sperm centrioles.** (a-c) Slices through Volta phase plate cryo-tomograms of the neck region in intact pig (a), horse (b), and mouse (c) sperm. (d-f) Three-dimensional architecture of the flagellar base, with the connecting piece in grey, the proximal centriole in green, distal centriole doublets in blue and singlets in pink, and electron-dense bars in yellow. The connecting piece was segmented semi-automatically with a neural network, while microtubules were traced manually. **Labels:** nuc - nucleus, bp - baseplate, sc - striated columns, odf - outer dense fibers, mito - mitochondria. **Scale bars:** 250 nm.

255 nine separate columns that fuse distally with the ODFs (Fig. 269  
256 3d-f, panels v). 270 shorter triplets always facing the Y-shaped segmented column 9 (Fig. 3d).

257 The connecting piece displays both marked left-right  
258 asymmetry and dorsoventral asymmetry in all three species.  
259 The PC is embedded within the proximal region of the connect-  
260 ing piece, and always on the same side. In pig sperm, 272  
261 one side of the proximal centriolar vault is formed by the Y-  
262 shaped SC 9, which also gives the entire connecting piece 274  
263 dorsoventral asymmetry (Fig. 3d, panel ii). The material 275  
264 of the connecting piece extends through the interstices of the  
265 PC triplets (Fig. 1a-c) and is continuous with electron-dense 277  
266 material within the proximal lumen of the PC (Fig. 1a'). In-  
267 triguingly, the dorsoventral asymmetry of the pig sperm PC is  
268 defined relative to the connecting piece, with the side of the 280

The pig sperm connecting piece also has two electron-  
dense bars associated with the central singlets of the DC (Fig.  
3a,d, yellow and goldenrod), which resemble the bars ob-  
served in the bovine sperm connecting piece (Ounjai et al.,  
2012). These bars are conspicuously absent from horse and  
from mouse sperm. Instead, mouse sperm have two electron-  
dense structures flanking the SCs (asterisks in Fig. 3c,f),  
an arrangement reminiscent of the distribution pattern of the  
centrosomal protein speriolin (Goto et al., 2010; Ito et al.,  
2019).

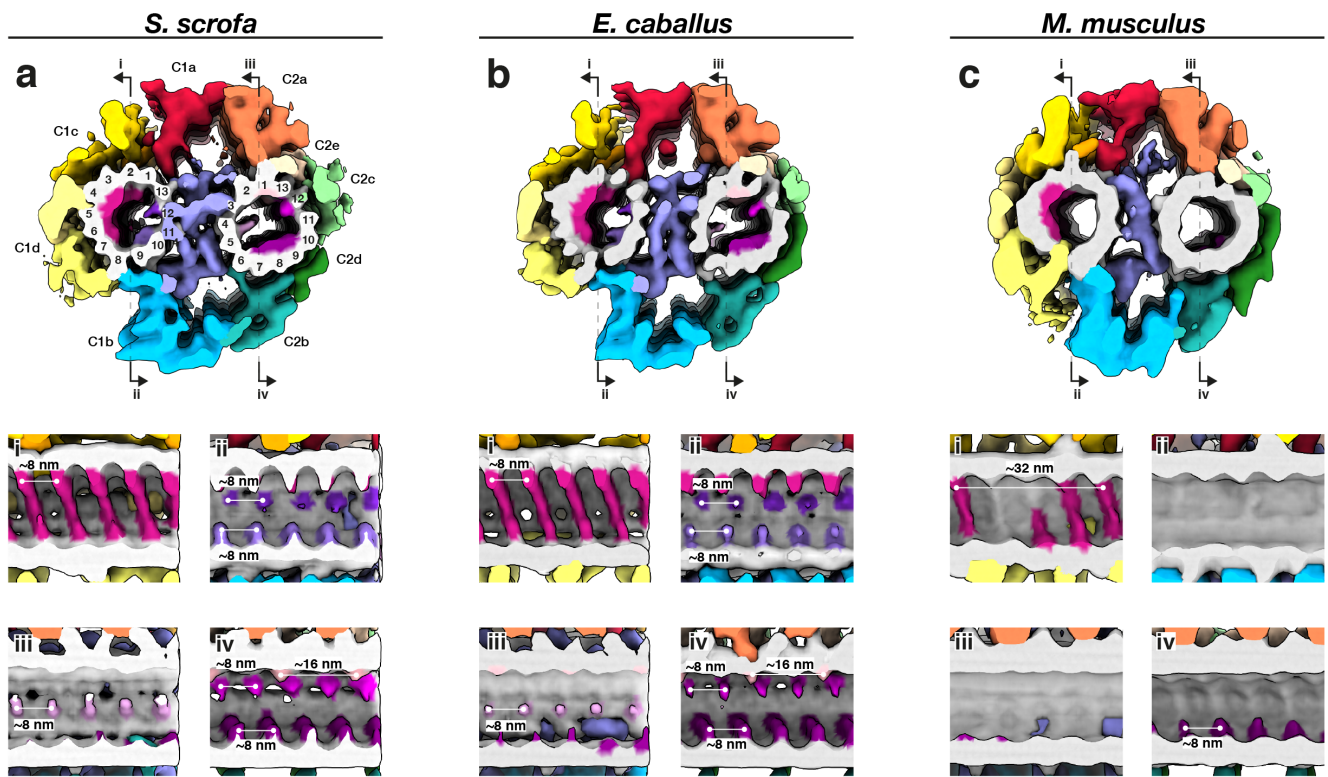

**Fig. 4. The mammalian sperm central pair apparatus (CPA) has a conserved projection network but species-specific microtubule inner proteins.** (a-c) Whole-population *in situ* structures of the 32-nm CPA repeat from pig (a), horse (b), and mouse (c) sperm.

281 **The mammalian sperm axoneme anchors unique ac-** 309  
 282 **cessory structures and species-specific microtubule** 310  
 283 **inner proteins.** To gain insight into the molecular archite- 311  
 284 ture of the axoneme, we determined *in situ* structures of the 312  
 285 central pair apparatus (Fig. 4) and of the 96-nm axonemal 313  
 286 doublet repeat (Fig. 5). Our structures of the CPA are the 314  
 287 first from any mammalian system, and our structures of the 315  
 288 doublets are the first from any mammalian sperm, thus filling 316  
 289 crucial gaps in the gallery of axoneme structures. The over- 317  
 290 all architecture of the mammalian CPA projection network is 318  
 291 similar across the three species we examined (Fig. S2) and 319  
 292 resembles that of the CPA from *Chlamydomonas* and from 320  
 293 sea urchin sperm (Carbajal-González et al., 2013; Fu et al., 321  
 294 2019). Indeed, mutations in *hydin*, a component of the C2b 322  
 295 projection, impair ciliary motility in both *Chlamydomonas* 323  
 296 and mice (Lehtreck et al., 2008). However, the mammalian 324  
 297 sperm CPA lacks the C1f projection found between the C1b 325  
 298 and C1d projections in *Chlamydomonas* and sea urchin. 326

299 Mammalian CPAs have several MIPs (Fig. 4) that are absent 327  
 300 from *Chlamydomonas* and from sea urchin sperm, which 328  
 301 have only small MIPs or no MIPs respectively. Similar to the 329  
 302 PC (Fig. 1d), pig and horse CPAs have large helical MIPs in 330  
 303 the C1 microtubule that bridge protofilaments 1-7 and repeat 331  
 304 every 8 nm (Fig. 4a-b, panels i). The mouse CPA has smaller 332  
 305 MIPs in the same area, but these bridge fewer protofilaments 333  
 306 and repeat with an overall periodicity of 32 nm (Fig. 4c, 334  
 307 panel i). Pig and horse also have smaller C1 MIPs on the side 335  
 308 facing the bridge, with one bridging protofilaments 9 and 10 336

and the other jutting out from between protofilaments 12 and 13 (Fig. 4a-b, panels ii). Both of these MIPs repeat every 8 nm and both are absent from the mouse (Fig. 4c, panel ii). In the C2 microtubule, the pig and the horse have several other MIPs that are also absent from the mouse. These include a MIP that protrudes out from between protofilaments 4 and 5 and repeats every 8 nm (Fig. 4a-b, panel iii), a MIP that binds between protofilaments 1 and 13 and repeats every 16 nm, and a MIP that extends from protofilament 12 and repeats every 8 nm (Fig. 4a-b, panel iv). A fourth B-tubule MIP bridges protofilaments 7-9 in the pig and the horse, but this MIP is smaller and only bridges protofilaments 8 and 9 in the mouse (Fig. 4a-c, panels iv).

Our *in situ* structures of the 96-nm axonemal doublet repeat from mammalian sperm revealed density for attachment to the outer dense fibers (ODFs) as well as novel structural features associated with the radial spokes (RSs) (Fig. 5, Fig. S3). In particular, we observed a barrel-shaped structure associated with RS1 (the RS1 barrel) and an extensive bridge linking the stalks of RS2 and RS3 (the RS2-RS3 bridge). These structures are absent from all other axoneme structures reported so far (Fig. S3a-g).

By focused classification, we resolved two distinct classes of particles, one with and the other without density for the RS1 barrel (Fig. 5d-f). By separating out only particles with the barrel, classification also allowed us to improve the density for this structure. The RS1 barrel is ~18 nm long and ~16 nm wide and makes two major contacts with RS1, one at

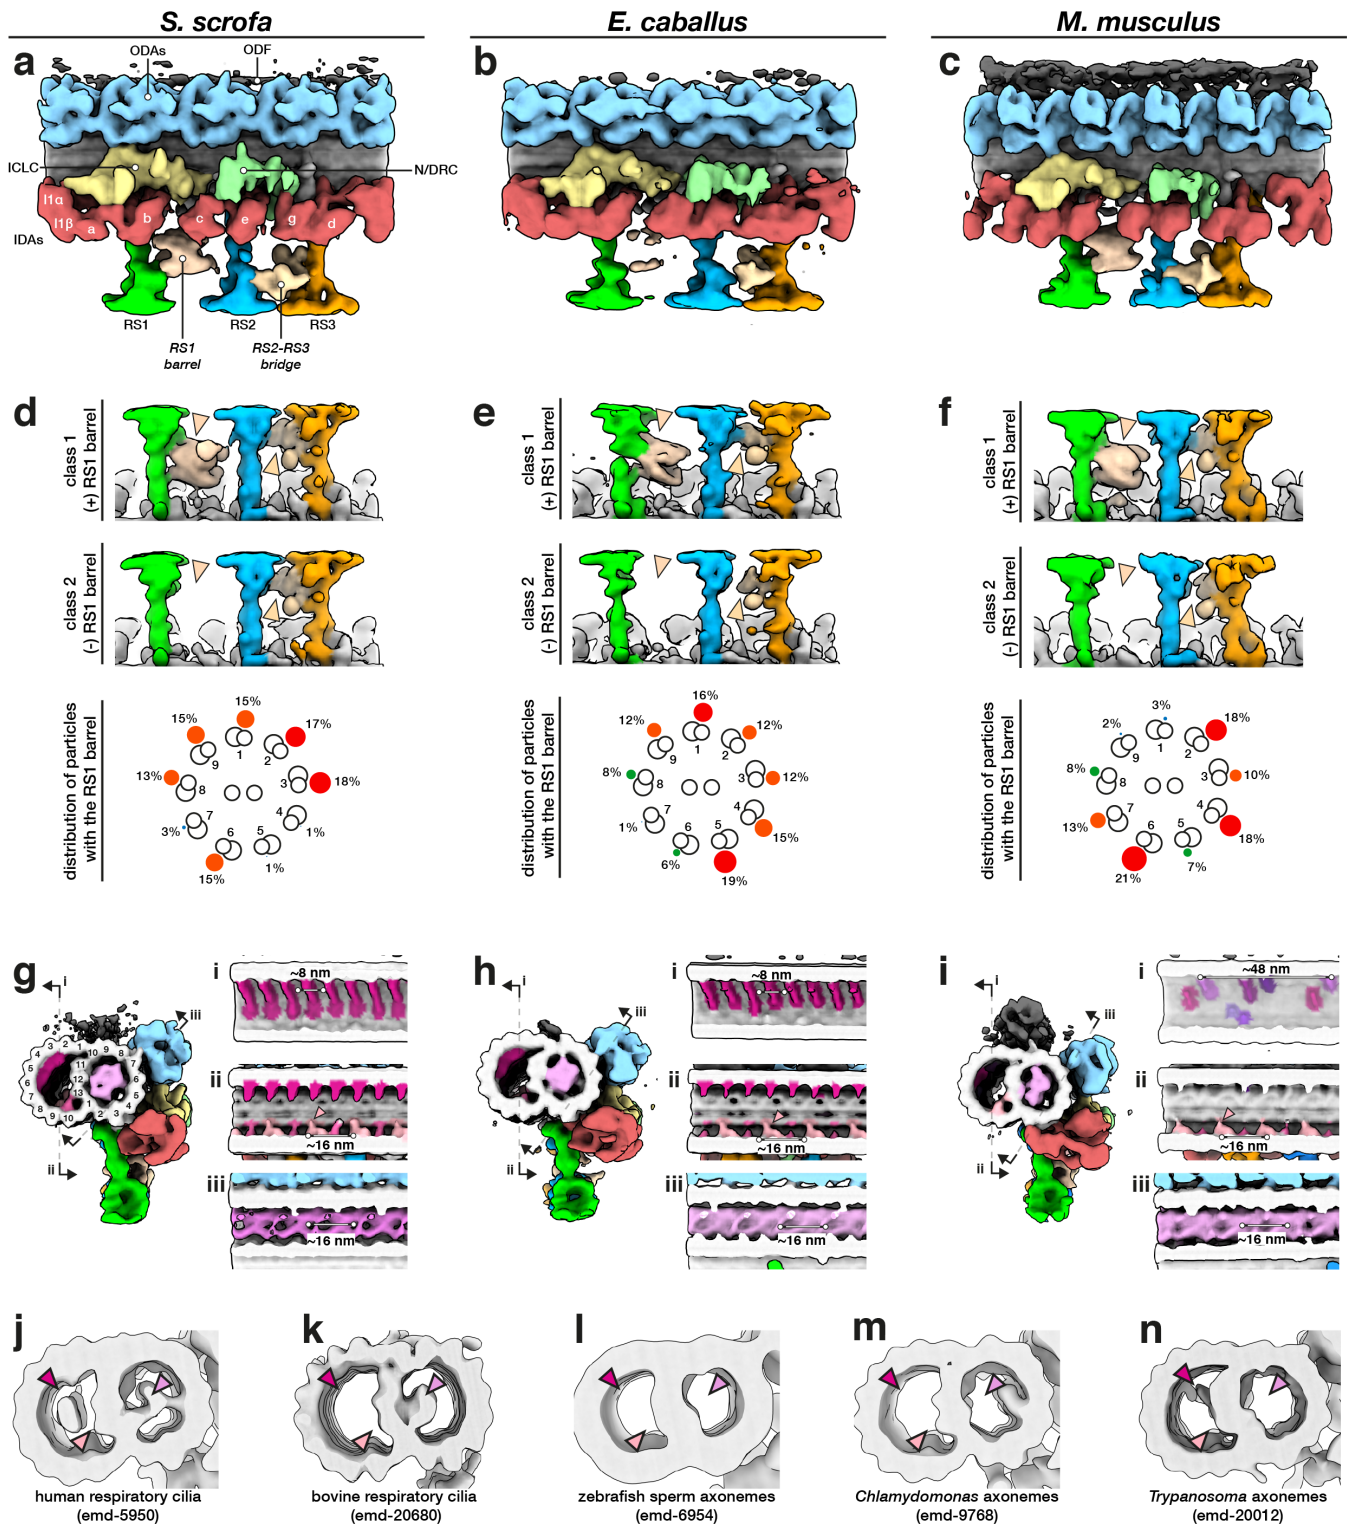

**Fig. 5. The mammalian sperm axoneme anchors unique accessory structures and species-specific microtubule inner proteins.** (a-c) Whole-population *in situ* structures of the 96-nm repeat from pig (a), horse (b), and mouse (c) sperm. (d-f) Classification focused on the RS1 barrel revealed two distinct classes of particles, one with (top panels) and one without (middle panels) the structure. Particles with the RS1 barrel are distributed asymmetrically around the axoneme (bottom panels). (g-i) Microtubule inner proteins in axonemes from pig (g), horse (h), and mouse (i) sperm. (j-n) Microtubule inner proteins in axonemes from other cell types and organisms.

337 the base of the head and one at the middle of the stalk. Inter- 339 the axoneme. Although the RS1 barrel is not particularly en-  
338 estingly, the RS1 barrel is distributed asymmetrically around 340 riched in any individual doublet position, it seems to occur

341 less frequently in specific positions. In the pig, only 1% of 397  
342 the particles were found in each of doublets 4 and 5, while 398  
343 only 3% were in doublet 7. In the horse, only 1% were found 399  
344 in doublet 7. In the mouse, only 2% were found in doublet 9 400  
345 and 3% in doublet 1. 401

346 Comparing mammalian sperm axonemes to those from 402  
347 other species reveals large variations in MIP densities (**Fig.** 403  
348 **5g-n**). Mammalian sperm have a large MIP that fills almost 404  
349 the entire lumen of the A-tubule (the A-MIP) (**Fig. 5g-i, bot-** 405  
350 **tom panels**), which explains why the A-tubule appears dark 406  
351 in cross-section. The A-MIP makes extensive contacts with 407  
352 the A-tubule, including protofilaments A1-A3, A5-A6, and 408  
353 A8-A13, and has an overall periodicity of ~16 nm. Because 409  
354 the sperm A-MIP makes contacts with nearly all protofila- 410  
355 ments of the A-tubule, it seems plausible that it would affect 411  
356 the mechanics of the doublet. The A-MIP also makes con- 412  
357 tacts with the same protofilament 9 to which the ODFs at- 413  
358 tach, which suggests that it may also functionalize the outer 414  
359 surface of the A-tubule for ODF docking. A-tubule MIPs 415  
360 are present in axonemes from human (**Fig. 5j**) (Lin et al., 416  
361 2014a) and bovine (**Fig. 5k**) respiratory cilia (Greenan et al., 417  
362 2020), but these are not as extensive as the A-MIP in mam- 418  
363 malian sperm (**Fig. S3h**). Zebrafish (**Fig. 5l**) (Yamaguchi et 419  
364 al., 2018) and sea urchin sperm (Lin et al., 2014b; Nicastro 420  
365 et al., 2011) do not have large MIPs in the A-tubule, nor do 421  
366 *Chlamydomonas* (**Fig. 5m**) (Nicastro et al., 2011; Owa et al., 422  
367 *Trypanosoma* (**Fig. 5n**) (Imhof et al., 2019). 423  
424

368 In all axoneme structures reported so far, B-tubules con- 425  
369 tain MIP3a and MIP3b, which bind to protofilaments B9 and 426  
370 B10 with staggered ~16-nm repeats (**Fig. 5g-i**). However, 427  
371 in mammalian sperm, MIP3a has an additional density that 428  
372 links it to protofilament A13 (**Fig. 5g-i, panels ii, pink ar-** 429  
373 **rowheads; Fig. S3h**). In pig and horse sperm, a helical MIP 430  
374 with an ~8-nm repeat bridges protofilaments B2-B7 (**Fig. 5g-** 431  
375 **i, panels i**). Mouse sperm do not have this large MIP and 432  
376 instead have smaller MIPs that bind with an overall appar- 433  
377 ent periodicity of ~48-nm (**Fig. 5i, panel i**). Large B-tubule 434  
378 MIPs have so far only been seen in human respiratory cilia 435  
379 (**Fig. 5j**) and in *Trypanosoma* (the ponticulus, **Fig. 5n**), but 436  
380 the morphometry of these MIPs differs from the helical MIPs 437  
381 in mammalian sperm. 438

382 A crucial comparison comes from the structure of ax- 439  
383 onemes from mouse respiratory cilia (Ueno et al., 2012). 440  
384 Mouse respiratory cilia lack the large A-MIP that is so promi- 441  
385 nent in mouse sperm, which points to cell-type specific differ- 442  
386 ences in the MIP repertoire. Similarly, the RS1 barrel and the 443  
387 RS2-RS3 bridge (**Fig. 5**) are present in mammalian sperm, 444  
388 but not in human respiratory cilia or zebrafish sperm (**Fig.** 445  
389 **S3d,e**). Because the radial spokes are key regulators of flag- 446  
390 ellar motility, as evidenced by the fact that radial spoke de- 447  
391 fects cause a number of ciliopathies (Lin et al., 2014a), the 448  
392 RS1 barrel and the RS2-RS3 bridge are likely to play a sig- 449  
393 nificant role in modulating sperm motility. As with many of 450  
394 the structures we report, defining why exactly they are needed 451  
395 in mammalian sperm would help us better understand the in- 452  
396 tricacies of flagellar organization. 453

## Outer dense fibers are directly coupled to axonemal doublets in the principal piece but not in the midpiece.

To resolve how the ODFs associate with the microtubule doublets of the axoneme, we aligned and averaged particles from the principal piece, then classified them with a mask on the ODF-doublet attachment. Our structures reveal that, for doublets associated with ODFs, the ODFs are directly coupled to protofilament 9 of the A-tubule (**Fig. 6a-c**). The ODF-doublet attachment consists of a pair of linkers spaced ~8 nm apart, with each pair spaced ~16 nm from the next, yielding an apparent overall periodicity of ~16 nm that is consistent across species. Direct ODF-microtubule coupling provides the elusive structural mechanism by which forces from axoneme bending can be transmitted through the ODFs to the base of the flagellum. As such, in the principal piece, the ODFs should be considered a part of the axoneme proper. This increases the effective diameter of the axoneme and also translates to an increase in bending moments (Lindemann, 1996; Lindemann and Lesich, 2016). However, the ODFs themselves are not of the same size, taper along the flagellum and terminate at different points, which leads to an anisotropic bending stiffness along the tail (Gadêlha and Gaffney, 2019; Lindemann, 1996).

To determine how ODF-doublet association changes along the flagellum, we then separately averaged the 96-nm repeat from the midpiece, proximal principal piece, and distal principal piece (**Fig. 6d-l**). Structures from the distal principal piece, after the ODFs had terminated, did not show density for the ODFs (**Fig. 6f',i',l'**). In the proximal principal piece, the ODFs are directly attached to the axoneme via the A-tubule as described above (**Fig. 6e',h',k'**). In the midpiece, the ODFs are at their largest but, surprisingly, are not directly connected to the microtubule doublets (**Fig. 6d',g',j'**). This inhomogeneous pattern of association seems to be a general feature of mammalian sperm, as we observed it in all three species we examined. Our data thus reveal that the organization of accessory structures in mammalian sperm flagella is more complex than previously thought.

## Singlet microtubules in the endpiece are capped by a conserved plug but contain species-specific microtubule inner proteins.

We then determined how the doublets of the axoneme transition into singlets of the endpiece (**Fig. 7a-c**). We found that doublets can transition into singlets by two possible arrangements, either by a doublet splitting into two independent singlets (**Fig. 7d-f, left panels**) or by the B-tubule terminating abruptly (**Fig. 7d-f, right panels**). Similar patterns have been observed in human sperm (Zabeo et al., 2019).

We further observed that the doublet-to-singlet transition is also associated with loss of density in the A-tubule (**Fig. 7d-f, asterisks**), although the precise location of this change relative to the splitting event varies. After the splitting event, 8-nm striations previously seen only in the B-tubule were visible in both singlets. The A-MIP thus seems to be a marker of the axoneme proper: the A-tubule lumen transitions from “empty” to “full” at the DC-to-axoneme transition (**Fig. 2i**), whereas it goes from “full” to “empty” at the doublet-to-



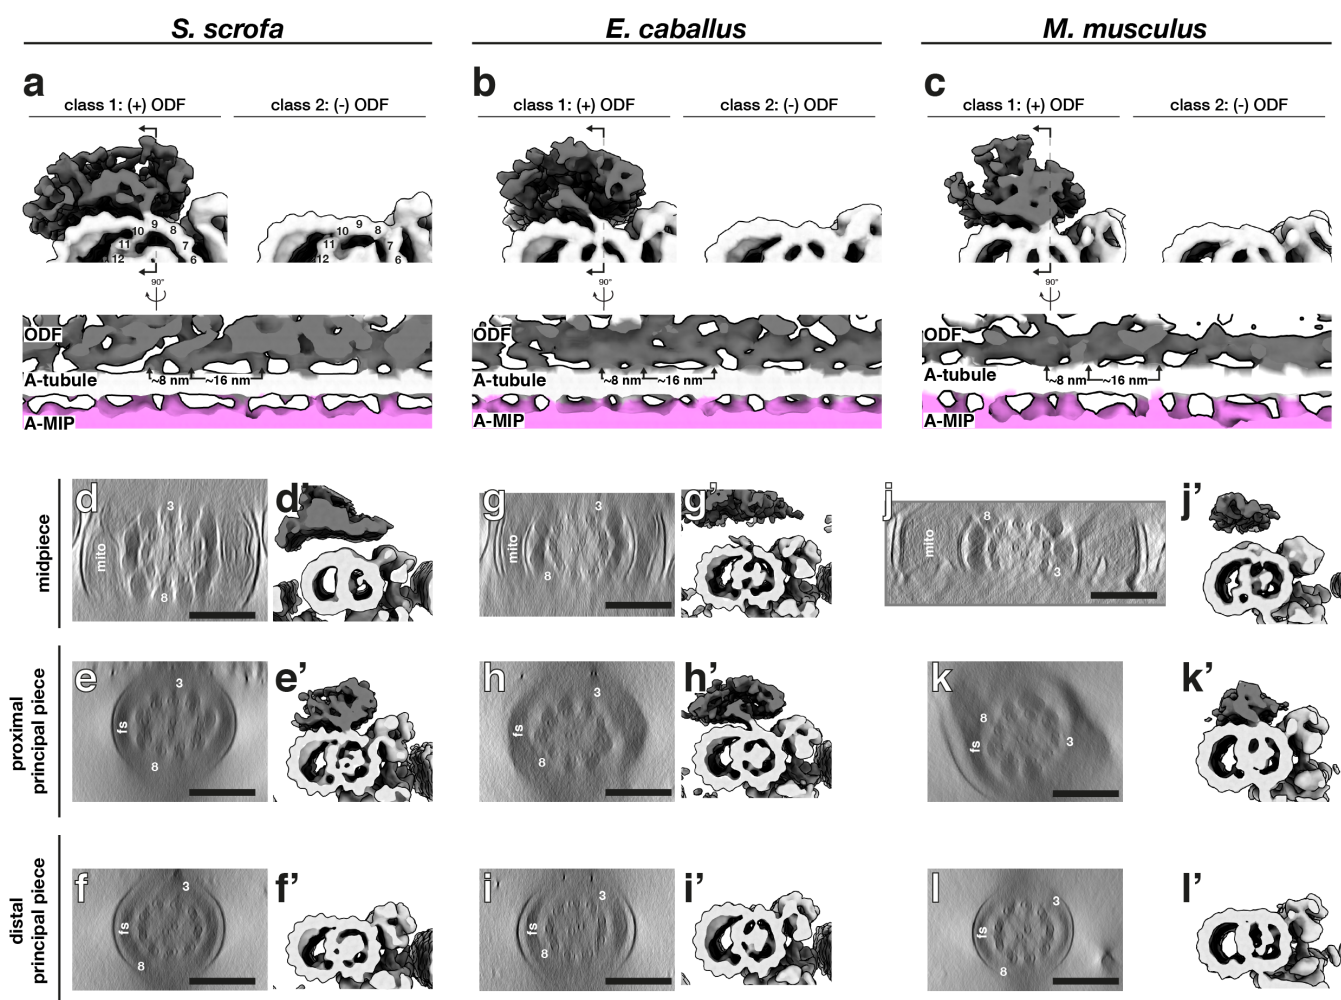

**Fig. 6. The attachment of outer dense fibers to axonemal doublets varies along the length of the sperm flagellum. (a-c) *In situ* structures of the 96-nm axonemal repeat from the principal piece of pig (a), horse (b), and mouse (c) sperm after classification focused on the ODF attachment. (d-l) Axoneme structures with particles from tomograms from (d,g,j) only the midpiece, (e,h,k) only the proximal principal piece, and (f,i,l) only the distal principal piece. Labels: ODF - outer dense fiber, mito - mitochondria, fs - fibrous sheath. Scale bars: 250 nm.**

454 singlet transition.

455 We averaged endpiece singlets from the three species and  
456 found that they are consistently comprised of 13 protofila-  
457 ments (Fig. 7g-i). In the pig and the horse, singlets con-  
458 tain a helical MIP that follows the microtubule lattice, similar  
459 to the MIP previously described for human sperm endpieces  
460 (Zabeo et al., 2018). Our higher-resolution averages now re-  
461 veal that this helical MIP makes independent contacts with  
462 both tubulin monomers (Fig. 7g-h, arrowheads). This heli-  
463 cal MIP is very similar to MIP7 we observed in the B-tubule  
464 of the PC (Fig. 1d), to the helical MIP on the outer wall of  
465 the B-tubule of the axonemal doublets (Fig. 5k-l), and to  
466 the helical MIPs in the CPA (Fig. 4a-b). Intriguingly, this  
467 MIP is absent from endpiece singlets in the mouse (Fig. 7i),  
468 where axonemal B-tubules and CPA microtubules also lack  
469 the large protofilament-bridging MIPs present in the pig and  
470 horse (Fig. 4c, 4m).

471 We further observed that microtubule termini are capped  
472 in all three species (Fig. 7a-c, black boxes). Averaging con-

473 firmed the presence of a plug extending 30 nm into the mi-  
474 crotubule lumen (Fig. 7a-c, white boxes). Normally, cili-  
475 ary length control and turnover of axonemal components is  
476 mediated by the intraflagellar transport (IFT) system. How-  
477 ever, IFT is absent in mature spermatozoa (San Agustin et al.,  
478 2015), which raises the question of how microtubule length  
479 and stability are maintained in these cells. These capping  
480 structures may stabilize free microtubule ends and prevent  
481 them from depolymerizing.

## Discussion

**Accessory structures are integral parts of mammalian sperm flagella and impose large mechanical asymmetries and anisotropies on the core axoneme.** The presence of accessory structures in mammalian sperm flagella has long been recognized, but details of their three-dimensional organization and interactions with the core axoneme have remained elusive. Our comparative structural analysis revealed that the accessory elements impose striking multi-

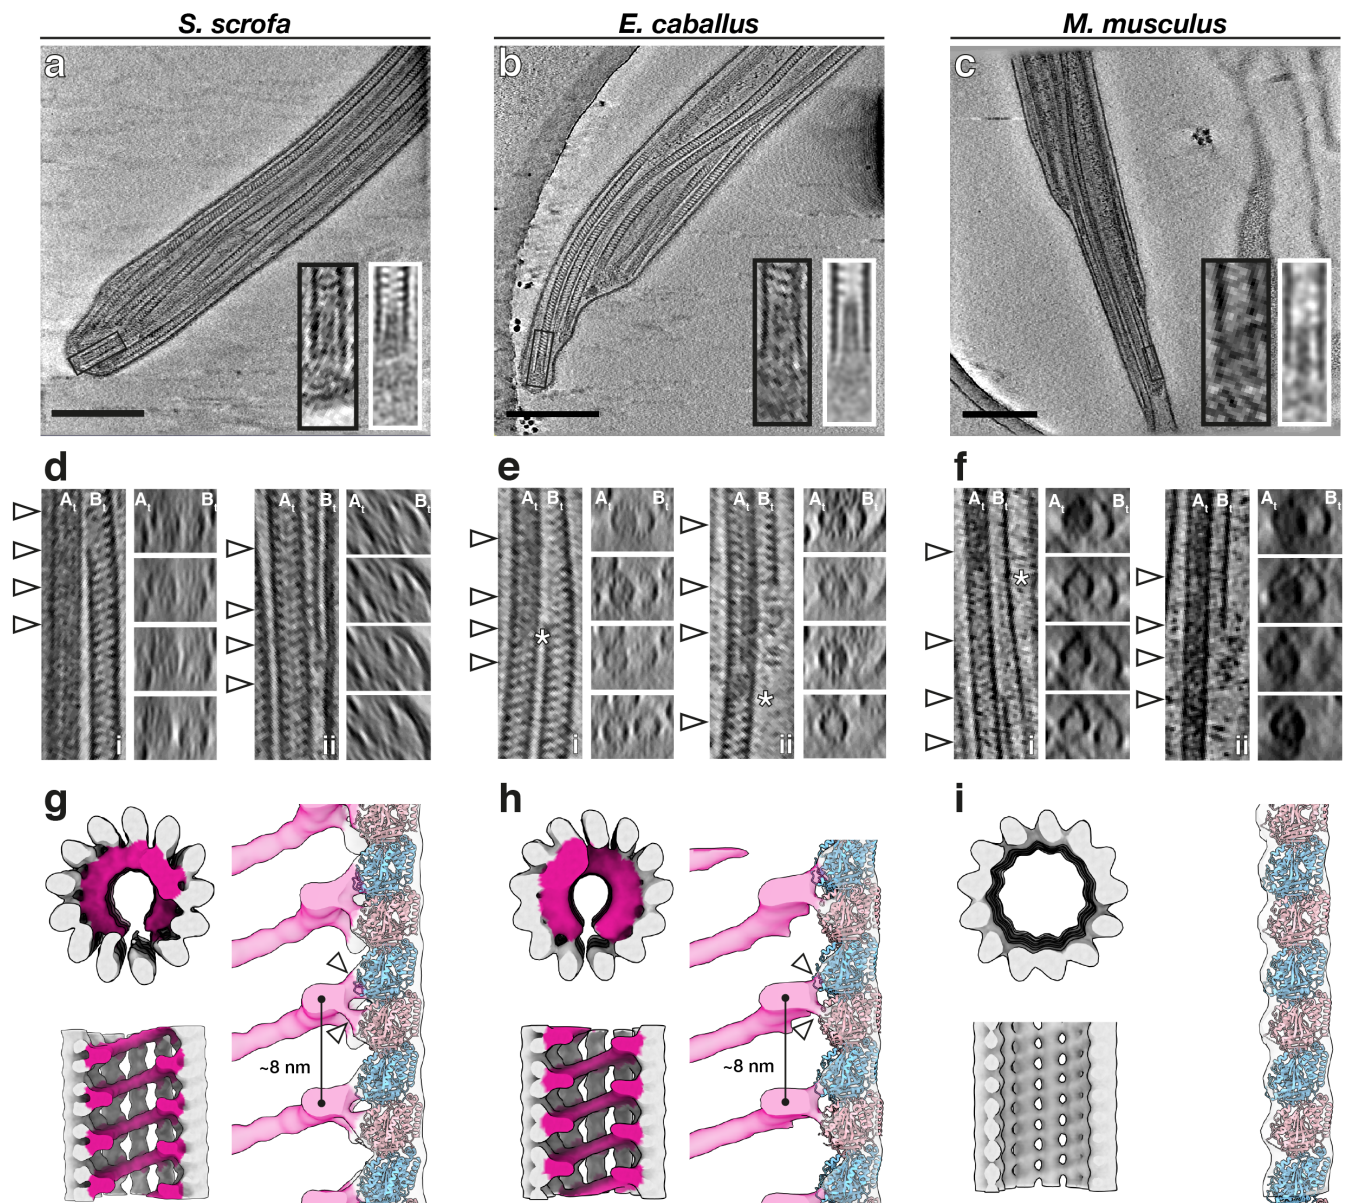

**Fig. 7. Singlet microtubules in the endpiece are capped by a conserved plug but contain species-specific microtubule inner proteins.** (a-c) Slices through defocus cryo-tomograms of the endpiece in pig (a), horse (b), and mouse (c) sperm. (d-f) Representative examples of the mechanisms by which doublets can transition into singlets. Doublets can split into two complete singlets (panels i), or the B-tubule can terminate abruptly with the A-tubule extending as a singlet (panels ii). (g-i) *In situ* structures of singlet microtubules from pig (g), horse (h), and mouse (i) sperm endpieces. **Labels:** A<sub>t</sub> - A-tubule, B<sub>t</sub> - B-tubule. **Scale bars:** 250 nm.

491 scale asymmetries and anisotropies on the sperm flagellum. 504  
 492 Of particular relevance to wave generation, we found promi- 505  
 493 nent asymmetry in the connecting piece at the base of the 506  
 494 flagellum (Fig. 3). This large-scale asymmetry could bias 507  
 495 basal sliding to one side relative to the head, consequently 508  
 496 polarizing inter-doublet sliding moments transmitted to the 509  
 497 rest of the axoneme. Indeed, in order to swim forward, 510  
 498 mouse sperm flagella must balance intrinsic asymmetry of 511  
 499 the waveform with episodic switching of side-to-side asym- 512  
 500 metric bends (Babcock et al., 2014). Asymmetric counter- 513  
 501 bends are also observed in rat sperm flagella, showing that 514  
 502 shear developed in the distal flagellum is not identical when 515  
 503 the flagellum is bent in the two opposing directions relative to 516

the head (Lindemann et al., 2005). Polarized waveforms have also been reported for human and bovine sperm (Friedrich et al., 2010; Gadêlha et al., 2020; Saggiorato et al., 2017). Mathematical models incorporating basal sliding have confirmed the critical role of this phenomenon on waveform generation, but no modelling framework has attempted to study the effects of basal asymmetry that are now evident in our structures.

We also found that, in the principal piece, the ODFs are directly coupled to a defined protofilament on the axonemal doublets (Fig. 5, 6). Such linkages provide a structural mechanism by which forces from axoneme bending can be transmitted through the ODFs to the base of the flagellum. Be-

517 cause the ODFs are anchored through the connecting piece at 574  
518 the base, these linkages also provide a mechanism by which 575  
519 changes in the base can be transmitted to the axoneme fur- 576  
520 ther down the tail. The ODFs also impose asymmetry and 577  
521 anisotropy on the flagellum; they gradually taper along the 578  
522 flagellum, but each ODF does so at a different rate, in contrast 579  
523 to the assumptions made in mathematical models incorporat- 580  
524 ing the ODFs (Gadêlha and Gaffney, 2019; Riedel-Kruse and 581  
525 Hilfinger, 2007). 582

526 Beyond the gradual tapering and staggered termination of 583  
527 the ODFs, we show that a further source of proximal-distal 584  
528 asymmetry is the association of the ODFs with the axone- 585  
529 mal doublets themselves (Fig. 6). Intriguingly, this arrange- 586  
530 ment has actually been suggested previously based on mea- 587  
531 surements of ODF-doublet spacing in thin-section TEM of 588  
532 bull sperm (Lesich et al., 2014), and we now show that it 589  
533 holds true at the molecular level in three other mammalian 590  
534 species. This configuration would allow the ODFs to slide 591  
535 relative to the axoneme while being restrained by the mito- 592  
536 chondrial sheath, lending flexibility to the midpiece. This 593  
537 is proposed to support formation of the extreme bends in 594  
538 the midpiece seen during hyperactivation (Lindemann and 595  
539 Lesich, 2016). Midpiece flexibility is crucial for sperm motil- 596  
540 ity and hyperactivation, and mice lacking the catalytic sub- 597  
541 unit of a sperm-specific calcineurin isoform are infertile be- 598  
542 cause they have more rigid midpieces (Miyata et al., 2015). 599  
543 Midpiece stiffness decreases as sperm transit through the epi- 600  
544 didymis (Jeulin et al., 1996; Miyata et al., 2015), which sug- 601  
545 gests that ODFs start out directly linked to the axoneme along 602  
546 their entire lengths and later locally detach in the midpiece.

547 Our comparative approach revealed that aforementioned 603  
548 details of how accessory structures relate to the microtubule 604  
549 core are conserved across species, suggesting that this archi- 605  
550 tecture is fundamental for mammalian sperm motility. How- 606  
551 ever, we also observe substantial inter-species variation, such 607  
552 as in the shape of the connecting piece (Fig. 3) and in the 608  
553 dimensions of ODFs (Fig. 6). Comparative motility stud- 609  
554 ies suggest that sperm flagella with larger ODFs form arcs 610  
555 with larger radii of curvature (Phillips, 1972). In contrast, 611  
556 how differences in the flagellar base and in head shape re- 612  
557 late to differences in motility remains largely unexplored. We 613  
558 hope our structures will motivate and inform further theoret- 614  
559 ical and empirical work on the role of the base in shaping the 615  
560 flagellar beat.

561 **Mammalian sperm are characterized by large, helical, 615**  
562 **protofilament-bridging microtubule inner proteins that 616**  
563 **may affect microtubule bending stiffness.** Our struc- 617  
564 tures show that ciliary MIPs are highly diverse, both within 618  
565 a single cilium and across cell types (Figs. 1, 2, 4, 5, 7). 619  
566 By comparing several ciliary assemblies, we show that there 620  
567 are fundamental differences in the MIP repertoire across cell 621  
568 types and lineages. Most notably, large helical protofilament- 622  
569 bridging MIPs are present in essentially all microtubule- 623  
570 based assemblies throughout the sperm flagellum in pig and 624  
571 in horse, although they are reduced in corresponding struc- 625  
572 tures in mouse sperm (Figs. 4-5). These MIPs seem to be 626  
573 characteristic of mammalian sperm flagella as they are ab- 627

sent from axonemes of zebrafish sperm, sea urchin sperm, and mammalian respiratory cilia (Fig. S3). Similar MIPs are present in human sperm endpiece singlets and in bovine respiratory epithelia, although in the latter they are restricted to the transition zone (Greenan et al., 2020). It is plausible that the helical MIPs are formed by variations of the same core protein complex, but direct confirmation awaits higher-resolution structures, genetic perturbation experiments, and direct labelling. If this were the case, however, this complex would have to adapt to the subtle differences in curvature between the walls of the centriolar/axonemal B-tubules and the 13-protofilament singlets.

The intimate and extensive contacts that the helical MIPs make with the tubulin lattice suggest that such a MIP would affect the mechanical properties of the microtubule itself. Microtubules are characterized by a paradoxical length-dependent bending stiffness attributed to the low shear modulus between adjacent protofilaments (Kurachi et al., 1995; Pampaloni et al., 2006; Taute et al., 2008). The protofilament-bridging MIPs observed here may decrease inter-protofilament shearing, increasing the shear modulus and the resulting bending stiffness of sperm microtubules. This adaptation might be necessary to withstand the large forces involved in moving the long flagellum of mammalian sperm, potentially reducing the length-dependency of bending stiffness in MIP-reinforced microtubules. These MIPs may also act as structural braces that suppress internal buckling within the axoneme under large loading in high viscosity fluids.

## Concluding Remarks

This study exemplifies the need for comparative studies of cilia and flagella, both from different species and from different cell types of the same species. Our study motivates future efforts to define how species-specific features of flagellar architecture affect the hydrodynamics of sperm motility. Such endeavours will likely involve the synthesis of structural cell biology, motility analysis, and mathematical modelling. The structures we present here provide crucial resources for understanding how the ancient and conserved ciliary microtubule core is ornamented to support motility through diverse fluid environments.

## Acknowledgements

The authors thank Dr. M Vanevic for enabling this project with superb computational support; Dr. D Vasishtan for providing scripts that greatly facilitated subtomogram averaging; Ingr. CTWM Schneijdenberg and JD Meeldijk for management and maintenance of the Utrecht University EM Square facility; Stal Schep (Tull en het Waal, The Netherlands) for providing horse semen; MW Haaker and M Houweling for providing mouse reproductive tracts; Prof. F Förster and Prof. A Akhmanova for critical reading of the manuscript; and Prof. EY Jones for insightful discussions. The authors also thank the Henriques Lab for the publicly-available L<sup>A</sup>T<sub>E</sub>X template. This work benefitted from access to the Nether-

lands Center for Electron Nanoscopy (NeCEN) with support  
from operators Dr. RS Dillard and Dr. CA Diebold and  
support from B Alewijnse. This work was funded by NWO  
Start-Up Grant 740.018.007 to TZ, and MRL is supported  
by a Clarendon Fund-Nuffield Department of Medicine Prize  
Studentship.

## Author Contributions

PM, MZ, HH, EGB, and BMG provided sperm samples.  
MRL, MCR, and RTR prepared samples for cryo-EM. MRL  
performed cryo-FIB milling. MRL, MCR, RTR, SCH, and  
TZ collected cryo-ET data. MRL and MCR processed data.  
MRL, MCR, and TZ analyzed data. MRL, HB, and TZ wrote  
the manuscript, and all authors contributed to revisions.

## Declaration of Interests

The authors declare no competing interests.

## Materials and Methods

**Sperm collection and preparation.** Pig sperm samples  
were purchased from an artificial insemination company  
(Varkens KI Nederland), stored at 18°C, and prepared for  
imaging within 1 day of delivery. Sperm were layered onto a  
discontinuous gradient consisting of 4 mL of 35% Percoll®  
(GE Healthcare) overlaid with 2 mL of 70% Percoll®, both  
in HEPES-buffered saline (HBS: 20 mM HEPES, 137 mM  
NaCl, 10 mM glucose, 2.5 mM KCl, 0.1% kanamycin, pH  
7.6) and centrifuged at 750g for 15 min at RT (Harrison et  
al., 1993). Pelleted cells were washed once in phosphate-  
buffered saline (PBS: 137 mM NaCl, 3 mM KCl, 8 mM  
Na<sub>2</sub>HPO<sub>4</sub>, 1.5 mM KH<sub>2</sub>PO<sub>4</sub>, pH 7.4), resuspended in PBS  
and counted with a hemocytometer.

Horse semen was collected from mature Warmblood stallions using a Hanover artificial vagina in the presence of a teaser mare. After collection, semen was filtered through gauze to remove gel fraction and large debris, then transported to the laboratory at 37°C and kept at room temperature until further processing. Semen was diluted in INRA96 (IMV Technologies) to obtain a sperm concentration of 30 x 10<sup>6</sup> cells/mL. After this, sperm were centrifuged through a discontinuous Percoll gradient as described above for pig sperm for 10 min at 300g followed by 10 min at 750g (Harrison et al., 1993). The remaining pellet was resuspended in 1 mL of PBS and centrifuged again for 5 min at 750g.

Mouse sperm were collected from the cauda epididymis of adult male C75BL/6 mice as described in (Hutcheon et al., 2017). Briefly, male mice were culled as described in (Mederacke et al., 2015) and the cauda epididymides were dissected with the vas deferens attached and placed in a 500 µL droplet of modified Biggers, Whitten, and Whittingham media (BWW: 20 mM HEPES, 91.5 mM NaCl, 4.6 mM KCl, 1.7 mM D-glucose, 0.27 mM sodium pyruvate, 44 mM sodium lactate, 5 U/mL penicillin, and 5 µg/mL streptomycin, adjusted to pH 7.4 and an osmolarity of 300 mOsm/kg). To retrieve the mature cauda spermatozoa from

the epididymides, forceps were used to first gently push the stored sperm from the vas deferens, after which two incisions were made with a razor blade in the cauda. Spermatozoa were allowed to swim out of the cauda into the BWW over a period of 15 min at 37°C, after which the tissue was removed and sperm were loaded onto a 27% Percoll density gradient and washed by centrifugation at 400g for 15 min. The pellet consisting of an enriched sperm population was resuspended in BWW and again centrifuged at 400g for 2 min to remove excess Percoll.

**Cryo-EM grid preparation.** Typically, 3 µL of a suspension containing either 2-3 x 10<sup>6</sup> cells/mL (for whole cell tomography) or 20-30 x 10<sup>6</sup> cells/mL (for cryo-FIB milling) was pipetted onto a glow-discharged Quantifoil R 2/1 200-mesh holey carbon grid. One µL of a suspension of BSA-conjugated gold beads (Aurion) was added, and the grids then blotted manually from the back (opposite the side of cell deposition) for ~3 s (for whole cell tomography) or for ~5-6 s (for cryo-FIB milling) using a manual plunge-freezer (MPI Martinsreid). Grids were immediately plunged into a liquid ethane-propane mix (37% ethane) (Tivol et al., 2008) cooled to liquid nitrogen temperature. Grids were stored under liquid nitrogen until imaging.

**Cryo-focused ion beam milling.** Grids were mounted into modified Autogrids (ThermoFisher) for mechanical support. Clipped grids were loaded into an Aquilos (ThermoFisher) dual-beam cryo-focused ion beam/scanning electron microscope (cryo-FIB/SEM). All SEM imaging was performed at 2 kV and 13 pA, whereas FIB imaging for targeting was performed at 30 kV and 10 pA. Milling was typically performed with a stage tilt of 18°, so lamellae were inclined 11° relative to the grid. Each lamella was milled in four stages: an initial rough mill at 1 nA beam current, an intermediate mill at 300 pA, a fine mill at 100 pA, and a polishing step at 30 pA. Lamellae were milled with the wedge pre-milling technique described in (Schaffer et al., 2017) and with expansion segments as described in (Wolff et al., 2019).

**Tilt series acquisition.** Tilt series were acquired on either a Talos Arctica (ThermoFisher) operating at 200 kV or a Titan Krios (ThermoFisher) operating at 300 kV, both equipped with a post-column energy filter (Gatan) in zero-loss imaging mode with a 20-eV energy-selecting slit. All images were recorded on a K2 Summit direct electron detector (Gatan) in either counting or super-resolution mode with dose-fractionation. Tilt series were collected using SerialEM (Mastrorade, 2005) at a target defocus of between -4 and -6 µm (conventional defocus-contrast) or between -0.5 and -1.5 µm (for tilt series acquired with the Volta phase plate). Tilt series were typically recorded using either strict or grouped dose-symmetric schemes, either spanning ± 56° in 2° increments or ± 54° in 3° increments, with total dose limited to ~100 e<sup>-</sup>/Å<sup>2</sup>.

**Tomogram reconstruction.** Frames were aligned either post-acquisition using Motioncor2 1.2.1 (Zheng et al., 2017)

734 or on-the-fly using Warp (Tegunov and Cramer, 2019). 787  
735 Frames were usually collected in counting mode, but when 788  
736 appropriate super-resolution frames were binned 2X dur- 789  
737 ing motion correction. Tomograms were reconstructed in 790  
738 IMOD (Kremer et al., 1996) using weighted back-projection, 791  
739 with a SIRT-like filter (Zeng, 2012) applied for visualization 792  
740 and segmentation. Defocus-contrast tomograms were CTF- 793  
741 corrected in IMOD using *ctfphaseflip* while VPP tomograms 794  
742 were left uncorrected.

743 **Tomogram segmentation.** Segmentation was generally  
744 performed semi-automatically using the neural network-  
745 based workflow implemented in the TomoSeg package in  
746 EMAN 2.21 (Chen et al., 2017). Microtubules, however,  
747 were traced manually in IMOD. Segmentation was then man-  
748 ually refined in Chimera 1.12 (Pettersen et al., 2004) or in  
749 ChimeraX (Goddard et al., 2018). Visualization was per-  
750 formed in ChimeraX.

751 **Subtomogram averaging.** Subtomogram averaging with  
752 missing wedge compensation was performed using PEET  
753 1.13.0 (Heumann et al., 2011; Nicastro et al., 2006). Resolu-  
754 tion was estimated using the Fourier shell correlation (FSC)  
755 at a cut-off of 0.5 (Nicastro et al., 2006). Alignments were  
756 generally performed first on binned data, after which aligned  
757 positions and orientations were transferred to less-binned  
758 data using scripts generously provided by Dr. Daven Va-  
759 sishtan. After alignment, classification was performed in or-  
760 der to assess heterogeneity and to identify cases of misalign-  
761 ment. Missing-wedge corrected classification was performed  
762 by first running a principal components analysis using the  
763 *pca* function, followed by k-means clustering using the *clus-*  
764 *terPca* function (Heumann et al., 2011). The resulting class  
765 averages were manually inspected, and similar classes were  
766 combined. Specific averaging strategies are described below.  
767 Details of particle numbers and resolution estimates for each  
768 average are reported in **Table S1**.

769 **Proximal centriole triplets, axonemal doublets, central**  
770 **pair apparatus.** Microtubule-based structures were manually  
771 traced in IMOD, and model points were added every 8 nm  
772 for PC triplets (Greenan et al., 2018), 32 nm for the CPA  
773 (Carbajal-González et al., 2013), or 96 nm for axonemal dou-  
774 blets (Nicastro et al., 2006) using *addModPts*. Subtomo-  
775 grams of approximately 70 nm x 42 nm x 70 nm (for cen-  
776 triole triplets), 100 nm x 100 nm x 100 nm (for the CPA), and  
777 100 nm x 100 x 100 nm (for doublets) were computationally  
778 aligned and averaged.

779 For averaging triplets and doublets, particles with similar  
780 orientations (e.g; positions 9, 1, and 2) were first averaged.  
781 Sub-averages were then manually rotated along the y-axis us-  
782 ing *modifyMotiveList* to align them with a common reference,  
783 followed by an alignment with a restricted search around the  
784 y-axis. If necessary, sub-averages were flipped to the right  
785 orientation using *modifyMotiveList* before a final restricted  
786 alignment in order to generate grand averages.

**Endpiece singlets.** Endpiece singlets were manually traced in  
IMOD, and model points were added every 8 nm using *ad-*  
*dModPts*. Subtomograms of approximately 35 nm x 35 nm x  
35 nm were computationally aligned and averaged. An initial  
alignment was performed to align protofilaments, after which  
a mask was used to focus alignment on the helical MIP. The  
mask was then expanded to include the microtubule and, after  
classification, a final restricted alignment was performed.

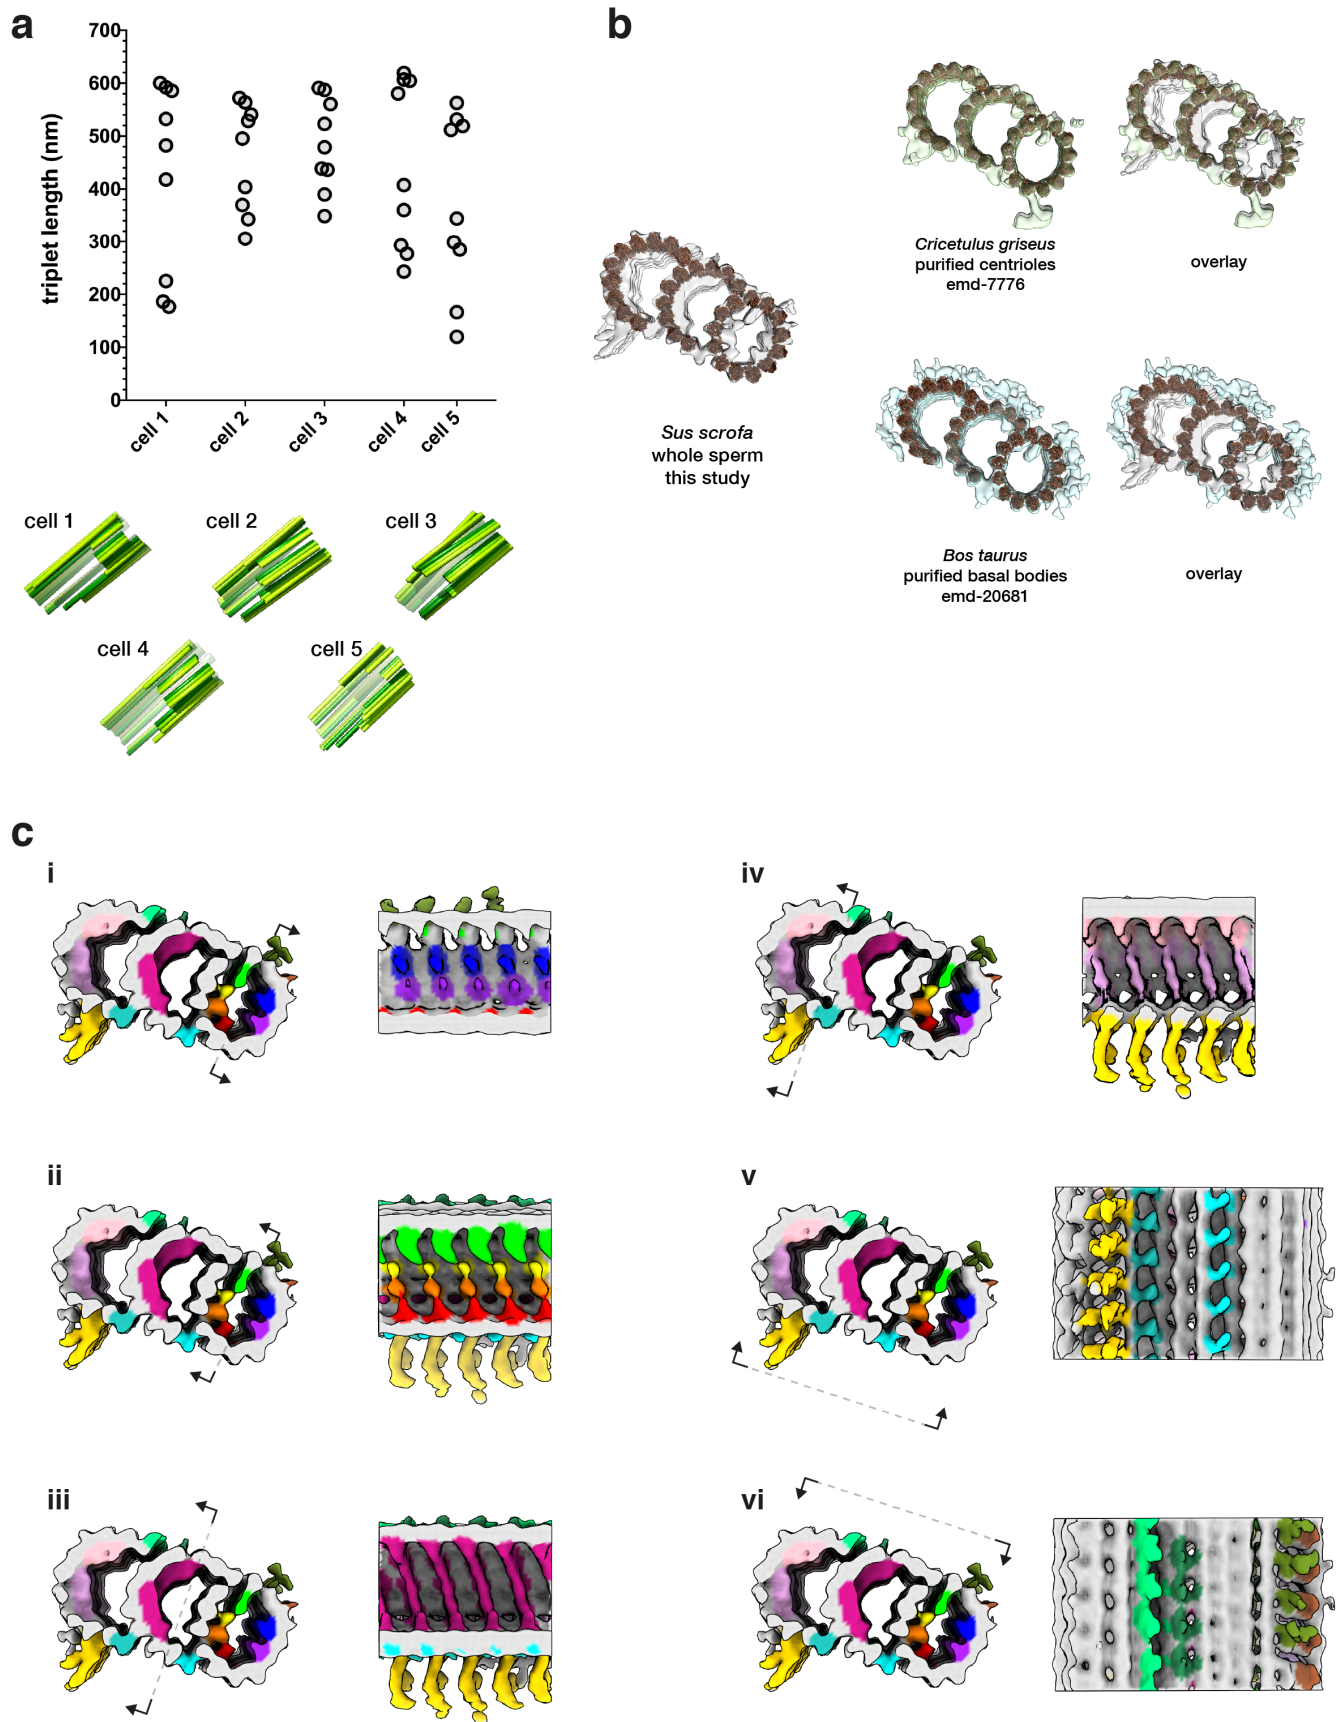

**Fig. S1. Structural features of the pig sperm proximal centriole (PC).** (a) PC triplets have unequal lengths (top panel) and shorter triplets are grouped on one side, giving the PC dorsoventral asymmetry (bottom panel). (b) Many of the microtubule inner proteins (MIPs) in the pig sperm PC are not found in other mammalian centriole structures. (c) Details of the MIP densities in the pig sperm PC.

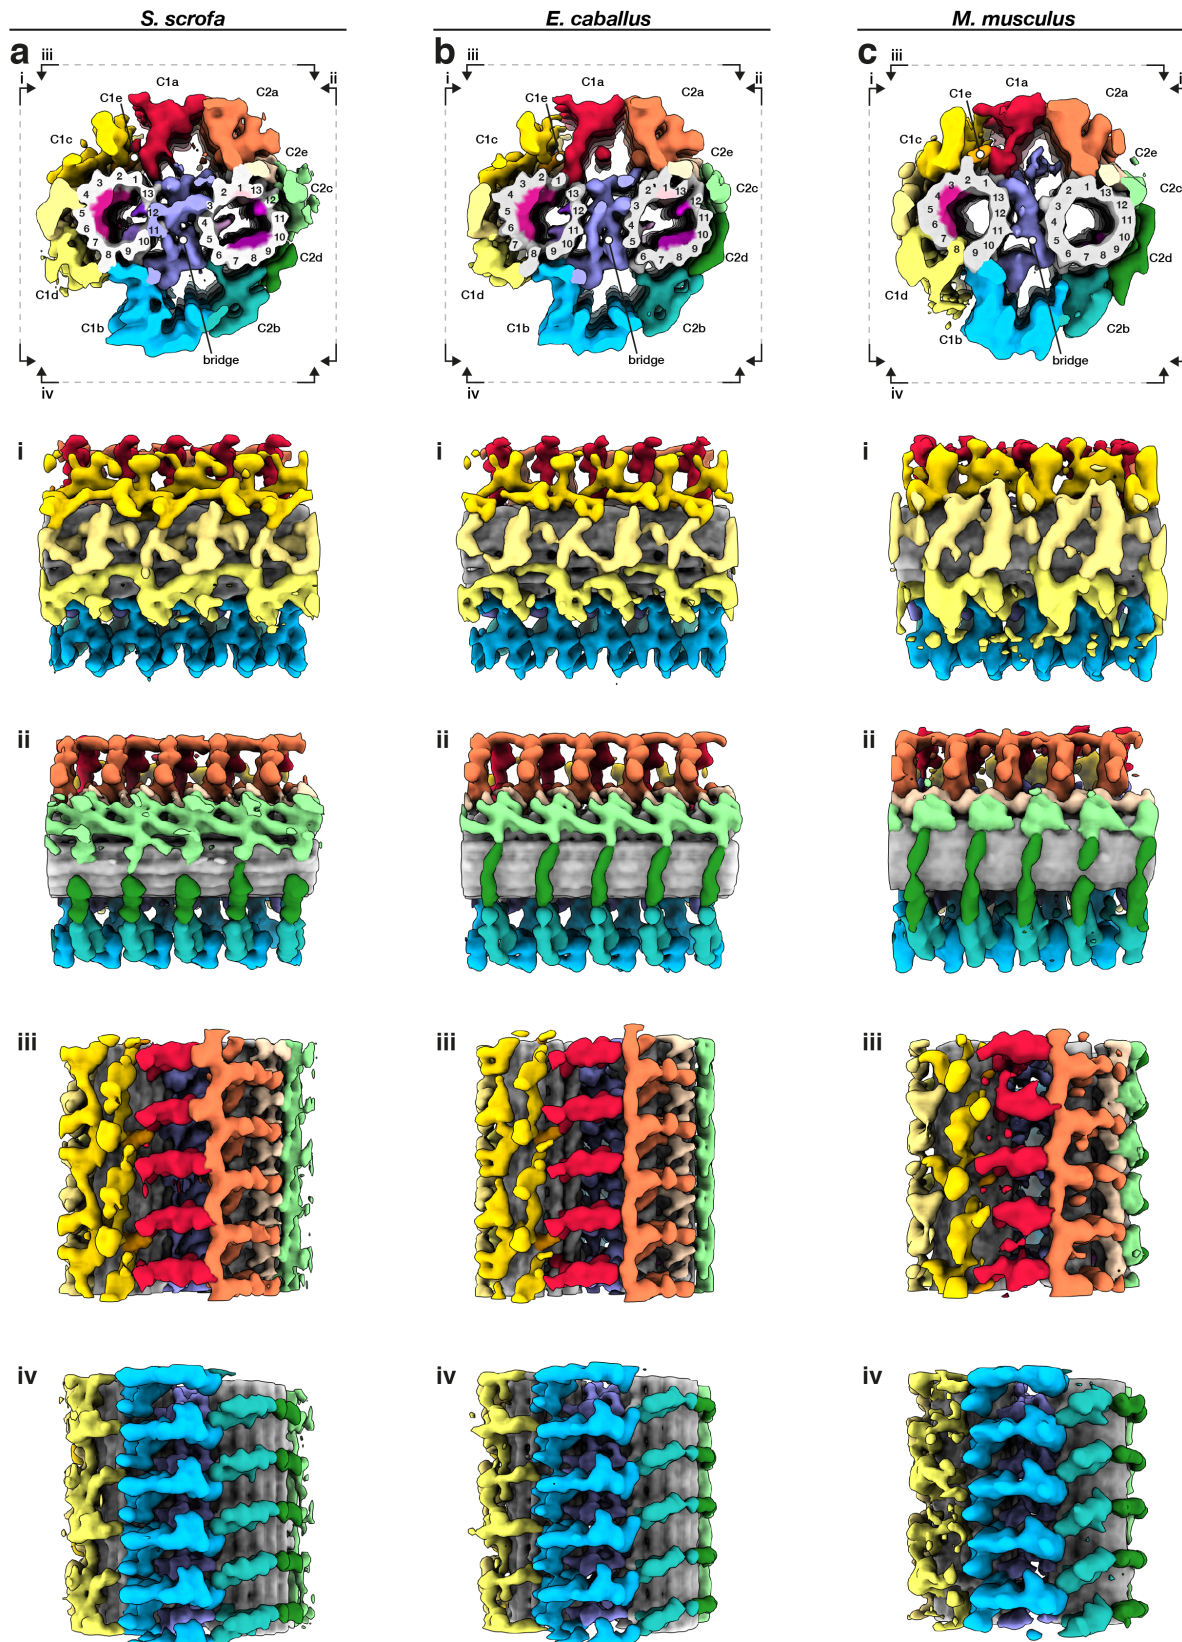

**Fig. S2. Structural details of the central pair apparatus projection network in mammalian sperm.** (a-c) Whole-population *in situ* structures of the 32-nm CPA repeat from pig (a), horse (b), and mouse (c) sperm. Individual rotated views show details of C1 projections (i), C2 projections (ii), the interface between C1a and C2a projections (iii), and the interface between C1b and C2b projections (iv).

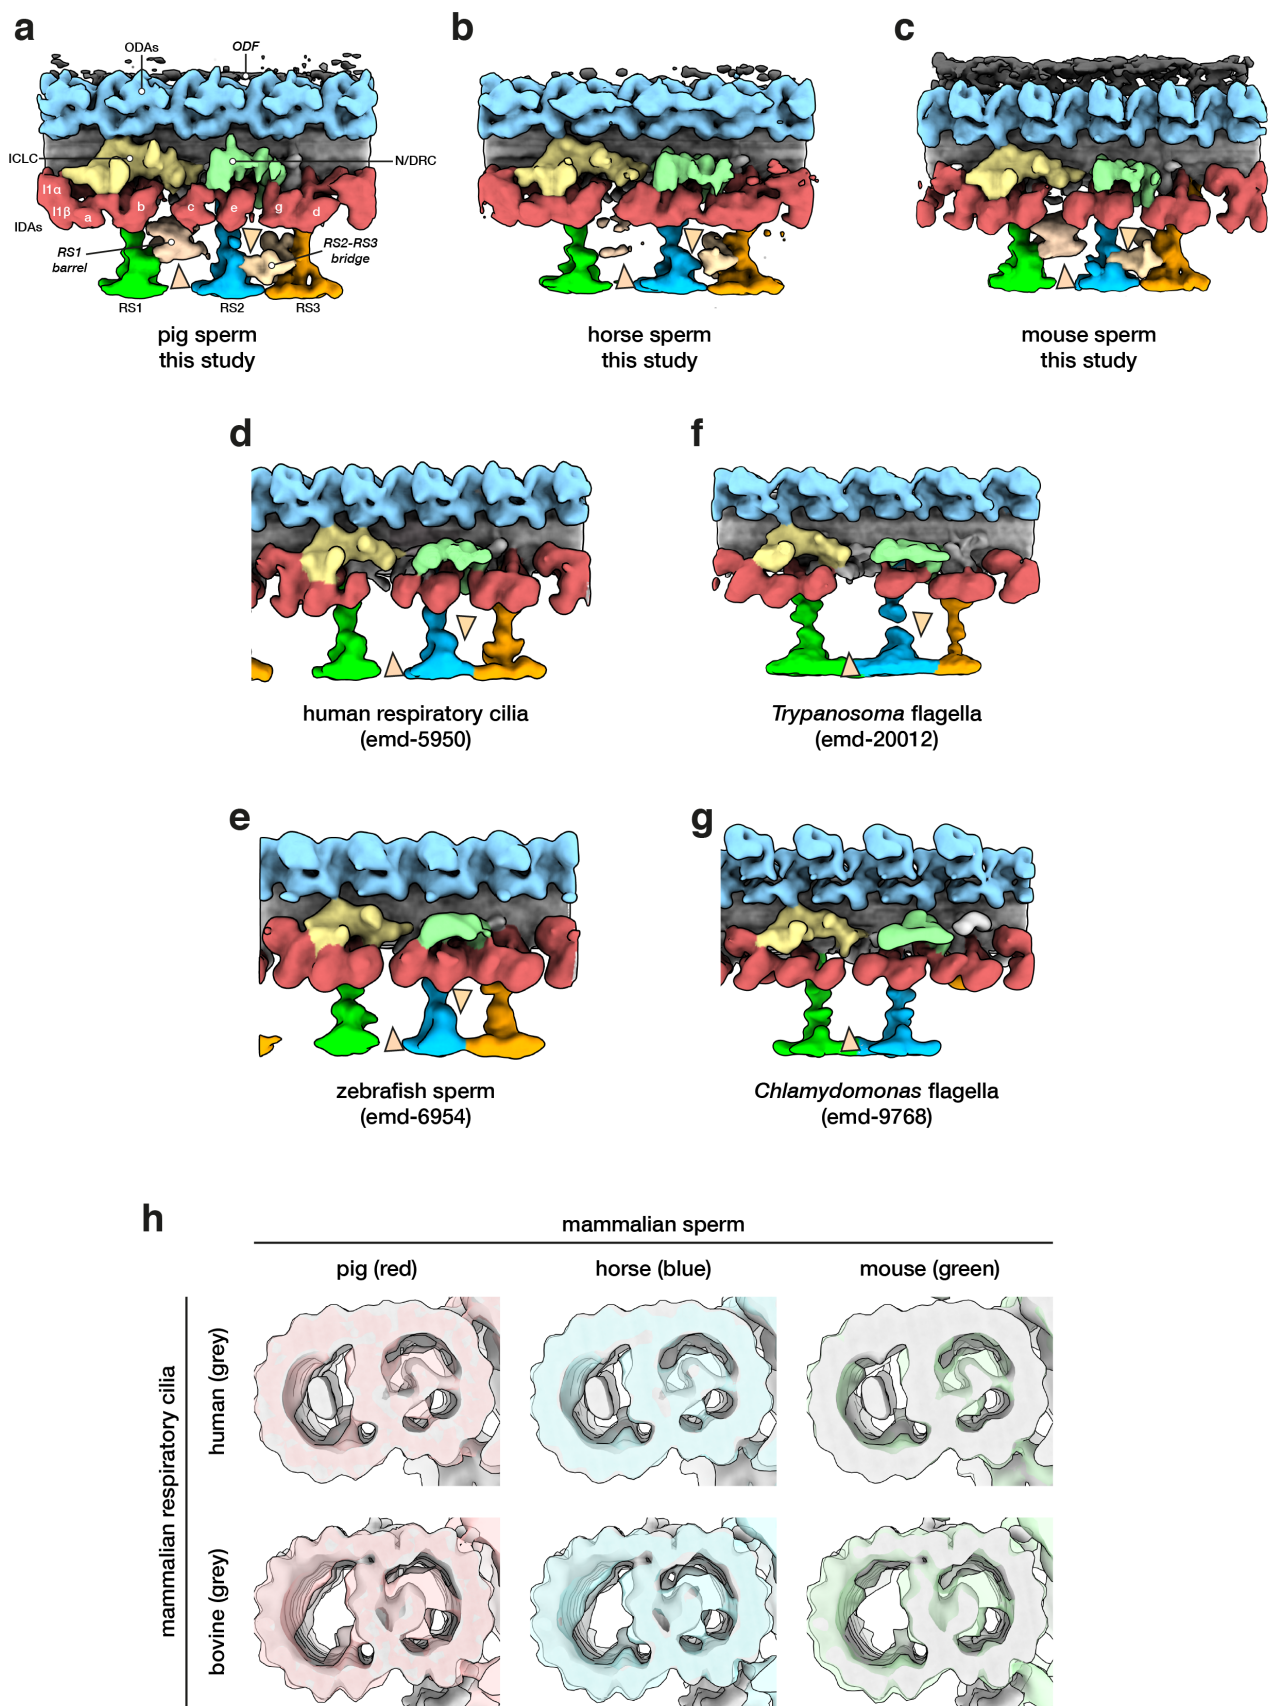

**Fig. S3. Comparing the mammalian sperm axoneme with structures from other cell types and species. (a-g)** Structures of the 96-nm axonemal repeat from various species in cell types. Arrowheads mark the novel RS1 barrel and RS2-RS3 bridge so far seen only in mammalian sperm. **(h)** A-tubule MIPs are present in mammalian respiratory cilia, but the A-MIP in mammalian sperm is larger and makes more extensive connections with the A-tubule itself.



**Table S1. Summary of image acquisition parameters and processing metrics for subtomogram averaging**

| Parameter                         | Species                |                        |                        |
|-----------------------------------|------------------------|------------------------|------------------------|
|                                   | <i>Sus scrofa</i>      | <i>Equus caballus</i>  | <i>Mus musculus</i>    |
| <b>proximal centriole</b>         |                        |                        |                        |
| sample type                       | lamellae               | -                      | -                      |
| microscope (accelerating voltage) | Arctica (200 kV)       | -                      | -                      |
| pixel size (Å)                    | 8.68                   | -                      | -                      |
| symmetry                          | C1                     | -                      | -                      |
| number of particles               | 202                    | -                      | -                      |
| estimated resolution (Å)          | 30                     | -                      | -                      |
| <b>distal centriole</b>           |                        |                        |                        |
| sample type                       | lamellae               | -                      | -                      |
| microscope (accelerating voltage) | Arctica (200 kV)       | -                      | -                      |
| pixel size (Å)                    | 8.68                   | -                      | -                      |
| symmetry                          | C1                     | -                      | -                      |
| number of particles               | 120                    | -                      | -                      |
| estimated resolution (Å)          | 30                     | -                      | -                      |
| <b>96-nm axonemal repeat</b>      |                        |                        |                        |
| sample type                       | whole cells / lamellae | whole cells / lamellae | whole cells / lamellae |
| microscope (accelerating voltage) | Arctica (200 kV)       | Arctica (200 kV)       | Krios (300 kV)         |
| pixel size (Å)                    | 11.32                  | 11.32                  | 14.16                  |
| symmetry                          | C1                     | C1                     | C1                     |
| number of particles               | 1438                   | 634                    | 1112                   |
| estimated resolution (Å)          | 37                     | 40                     | 40                     |
| <b>central pair complex</b>       |                        |                        |                        |
| sample type                       | whole cells            | whole cells / lamellae | whole cells / lamellae |
| microscope (accelerating voltage) | Arctica (200 kV)       | Arctica (200 kV)       | Arctica (200 kV)       |
| pixel size (Å)                    | 11.32                  | 11.32                  | 11.32                  |
| symmetry                          | C1                     | C1                     | C1                     |
| number of particles               | 978                    | 461                    | 281                    |
| estimated resolution (Å)          | 36                     | 34                     | 49                     |
| <b>endpiece singlets</b>          |                        |                        |                        |
| sample type                       | whole cells            | whole cells            | whole cells            |
| microscope (accelerating voltage) | Arctica (200 kV)       | Arctica (200 kV)       | Krios (300 kV)         |
| pixel size (Å)                    | 3.50                   | 5.66                   | 7.08                   |
| symmetry                          | C1                     | C1                     | C1                     |
| number of particles               | 5799                   | 9136                   | 1581                   |
| estimated resolution (Å)          | 19                     | 19                     | 30                     |

## References

- 795  
796 Avidor-Reiss, T. (2018). Rapid Evolution of Sperm Produces Diverse Centriole  
797 Structures that Reveal the Most Rudimentary Structure Needed for Function. *Cells*  
798 7, 67.  
799  
800 Babcock, D.F., Wandernoth, P.M., and Wennemuth, G. (2014). Episodic rolling and  
801 transient attachments create diversity in sperm swimming behavior. *BMC Biol.* 12,  
802 1–12.  
803  
804 Brokaw, C.J. (2009). Thinking about flagellar oscillation. *Cell Motil. Cytoskeleton*  
805 66, 425–436.  
806  
807 Carbajal-González, B.I., Heuser, T., Fu, X., Lin, J., Smith, B.W., Mitchell, D.R.,  
808 and Nicastro, D. (2013). Conserved structural motifs in the central pair complex of  
809 eukaryotic flagella. *Cytoskeleton* 70, 101–120.  
810  
811 Chen, M., Dai, W., Sun, S.Y., Jonasch, D., He, C.Y., Schmid, M.F., Chiu, W., and  
812 Ludtke, S.J. (2017). Convolutional neural networks for automated annotation of  
813 cellular cryo-electron tomograms. *Nat. Methods* 14, 983–985.  
814  
815 Fawcett, D.W. (1970). A Comparative View of Sperm Ultrastructure. *Biol. Reprod.*  
816 2, 90–127.  
817  
818 Fawcett, D.W. (1975). The Mammalian Spermatozoon. *Dev. Biol.* 44, 394–436.  
819  
820 Fishman, E.L., Jo, K., Nguyen, Q.P.H., Kong, D., Royfman, R., Cekic, A.R., Khanal,  
821 S., Miller, A.L., Simerly, C., Schatten, G., et al. (2018). A novel atypical sperm  
822 centriole is functional during human fertilization. *Nat. Commun.* 9, 2210.  
823  
824 Friedrich, B.M., Riedel-Kruse, I.H., Howard, J., and Jülicher, F. (2010). High-  
825 precision tracking of sperm swimming fine structure provides strong test of resistive  
826 force theory. *J. Exp. Biol.* 213, 1226–1234.  
827  
828 Fu, G., Zhao, L., Dymek, E., Hou, Y., Song, K., Phan, N., Shang, Z., Smith, E.F.,  
829 Witman, G.B., and Nicastro, D. (2019). Structural organization of the C1a-e-c  
830 supercomplex within the ciliary central apparatus. *J. Cell Biol.* 218, 4236–4251.  
831  
832 Gadêlha, H., and Gaffney, E.A. (2019). Flagellar ultrastructure suppresses buckling  
833 instabilities and enables mammalian sperm navigation in high-viscosity media. *J.*  
834 *R. Soc. Interface* 16.  
835  
836 Gadêlha, H., Hernández-Herrera, P., Montoya, F., Darszon, A., and Corkidi, G.  
837 (2020). Human sperm uses asymmetric and anisotropic flagellar controls to  
838 regulate swimming symmetry and cell steering. *Sci. Adv.* 6, eaba5168.  
839  
840 Gaffney, E.A., Gadêlha, H., Smith, D.J., Blake, J.R., and Kirkman-Brown, J.C.  
841 (2011). Mammalian Sperm Motility: Observation and Theory. *Annu. Rev. Fluid*  
842 *Mech.* 43, 501–528.  
843  
844 Gage, M.J.G. (2012). Complex sperm evolution. *Proc. Natl. Acad. Sci.* 109,  
845 4341–4342.  
846  
847 Goddard, T.D., Huang, C.C., Meng, E.C., Pettersen, E.F., Couch, G.S., Morris,  
848 J.H., and Ferrin, T.E. (2018). UCSF ChimeraX: Meeting modern challenges in  
849 visualization and analysis. *Protein Sci.* 27, 14–25.  
850  
851 Goto, M., O'Brien, D.A., and Eddy, E.M. (2010). Speriolin is a novel human and  
852 mouse sperm centrosome protein. *Hum. Reprod.* 25, 1884–1894.  
853  
854 Greenan, G.A., Kesztelyi, B., Vale, R.D., and Agard, D.A. (2018). Insights into  
855 centriole geometry revealed by cryotomography of doublet and triplet centrioles.  
856 *Elife* 7, 1–18.  
857  
858 Greenan, G.A., Vale, R.D., and Agard, D.A. (2020). Electron cryotomography of  
859 intact motile cilia defines the basal body to axoneme transition. *J. Cell Biol.* 219,  
860 1–14.  
861  
862 Guennec, M. Le, Klena, N., Gambarotto, D., Laporte, M.H., Tassin, A., Hoek, H.,  
863 Van Den, Erdmann, P.S., Schaffer, M., Kovacic, L., Borgers, S., et al. (2020). A  
864 helical inner scaffold provides a structural basis for centriole cohesion. *Sci. Adv.* 6,  
865 eaaz4137.  
866  
867 Guichard, P., Hachet, V., Majubu, N., Neves, A., Demurtas, D., Olieric, N., Fluckiger,  
868 I., Yamada, A., Kihara, K., Nishida, Y., et al. (2013). Native architecture of the  
869 centriole proximal region reveals features underlying its 9-fold radial symmetry.  
870 *Curr. Biol.* 23, 1620–1628.  
871  
872 Haidl, G., Becker, A., and Henkel, R. (1991). Poor development of outer dense  
873 fibres as a major cause of tail abnormalities in the spermatozoa of asthenoterato-  
874 zoospermic men. *Hum. Reprod.* 6, 1431–1438.  
875  
876 Harrison RAP, Mairet B, Miller NGA. (1993) Flow cytometric studies of bicarbonate-  
877 mediated Ca<sup>2+</sup> influx in boar sperm populations. *Mol. Reprod. Dev.* 35, 197-208.  
878  
879 Heumann, J.M., Hoenger, A., and Mastronarde, D.N. (2011). Clustering and  
880 variance maps for cryo-electron tomography using wedge-masked differences. *J.*  
881 *Struct. Biol.* 175, 288–299.  
882  
883 Hutcheon, K., McLaughlin, E.A., Stanger, S.J., Bernstein, I.R., Dun, M.D., Eamens,  
884 A.L., and Nixon, B. (2017). Analysis of the small non-protein-coding RNA profile  
885 of mouse spermatozoa reveals specific enrichment of piRNAs within mature  
886 spermatozoa. *RNA Biol.* 14, 1776–1790.  
887  
888 Ichikawa, M., Liu, D., Kastiris, P.L., Basu, K., Hsu, T.C., Yang, S., and Bui, K.H.  
889 (2017). Subnanometre-resolution structure of the doublet microtubule reveals new  
890 classes of microtubule-associated proteins. *Nat. Commun.* 8.  
891  
892 Imhof, S., Zhang, J., Wang, H., Bui, K.H., Nguyen, H., Atanasov, I., Hui, W.H.,  
893 Yang, S.K., Zhou, Z.H., and Hill, K.L. (2019). Cryo electron tomography with Volta  
894 phase plate reveals novel structural foundations of the 96-nm axonemal repeat in  
895 the pathogen *Trypanosoma brucei*. *Elife* 8, 1–30.  
896  
897 Ishikawa, T. (2017). Axoneme structure from motile cilia. *Cold Spring Harb.*  
898 *Perspect. Biol.* 9, a028076.  
899  
900 Ito, C., Akutsu, H., Yao, R., Yoshida, K., Yamatoya, K., Mutoh, T., Makino, T.,  
901 Aoyama, K., Ishikawa, H., Kunimoto, K., et al. (2019). Odf2 haploinsufficiency  
902 causes a new type of decapitated and decaudated spermatozoa, Odf2-DDS, in  
903 mice. *Sci. Rep.* 9, 1–13.  
904  
905 Jeulin, C., Lewin, L.M., Chevrier, C., and Schoevaert-Brossault, D. (1996).  
906 Changes in Flagellar Movement of Rat Spermatozoa Along the Length of the  
907 Epididymis: Manual and Computer-Aided Image Analysis. *Cell Motil. Cytoskeleton*  
908 35, 147–161.  
909  
910 Khan, S., and Scholey, J.M. (2018). Assembly, Functions and Evolution of  
911 Archaeella, Flagella and Cilia. *Curr. Biol.* 28, R278–R292.  
912  
913 Kremer, J.R., Mastronarde, D.N., and McIntosh, J.R. (1996). Computer Visu-  
914 alization of Three-Dimensional Image Data Using IMOD. *J. Struct. Biol.* 116, 71–76.  
915  
916 Kurachi, M., Hoshi, M., and Tashiro, H. (1995). Buckling of a single microtubule  
917 by optical trapping forces: Direct measurement of microtubule rigidity. *Cell Motil.*  
918 *Cytoskeleton* 30, 221–228.  
919  
920 Lechtreck, K.F., Delmotte, P., Robinson, M.L., Sanderson, M.J., and Witman, G.B.  
921 (2008). Mutations in Hydin impair ciliary motility in mice. *J. Cell Biol.* 180, 633–643.  
922  
923 Lesich, K.A., de Pinho, T.G., Dang, L., and Lindemann, C.B. (2014). Ultrastructural  
924 evidence that motility changes caused by variations in ATP, Mg<sup>2+</sup>, and ADP corre-  
925 late to conformational changes in reactivated bull sperm axonemes. *Cytoskeleton*  
926 71, 649–661.  
927  
928 Li, S., Fernandez, J.J., Marshall, W.F., and Agard, D.A. (2012). Three-dimensional  
929 structure of basal body triplet revealed by electron cryo-tomography. *EMBO J.* 31,  
930 552–562.  
931  
932 Lin, J., Yin, W., Smith, M.C., Song, K., Leigh, M.W., Zariwala, M.A., Knowles, M.R.,  
933 Ostrowski, L.E., and Nicastro, D. (2014a). Cryo-electron tomography reveals ciliary  
934 defects underlying human RSPH1 primary ciliary dyskinesia. *Nat. Commun.* 5,  
935 5727.  
936  
937 Lin, J., Okada, K., Raytchev, M., Smith, M.C., and Nicastro, D. (2014b). Structural  
938 mechanism of the dynein power stroke. *Nat. Cell Biol.* 16, 479–485.  
939  
940 Lindemann, C.B. (1996). Functional significance of the outer dense fibers of  
941 mammalian sperm examined by computer simulations with the geometric clutch  
942 model. *Cell Motil. Cytoskeleton* 34, 258–270.  
943  
944 Lindemann, C.B., and Lesich, K.A. (2016). Functional anatomy of the mammalian  
945 sperm flagellum. *Cytoskeleton* 73, 652–669.  
946  
947 Lindemann, C.B., Macauley, L.J., and Lesich, K.A. (2005). The counterbend  
948 phenomenon in dynein-disabled rat sperm flagella and what it reveals about the  
949 interdoubt elasticity. *Biophys. J.* 89, 1165–1174.  
950  
951 Lüpold, S., and Pitnick, S. (2018). Sperm form and function: what do we know  
952 about the role of sexual selection? *Reproduction* 155, R229-243.  
953  
954 Manandhar, G., Sutovsky, P., Joshi, H.C., Stearns, T., and Schatten, G. (1998).  
955 Centrosome reduction during mouse spermiogenesis. *Dev. Biol.* 203, 424–434.  
956  
957 Manandhar, G., Simerly, C., and Schatten, G. (2000). Highly degenerated distal  
958 centrioles in rhesus and human spermatozoa. *Hum. Reprod.* 15, 256–263.  
959  
960 Marko, M., Hsieh, C., Schalek, R., Frank, J., and Mannella, C. (2007). Focused-  
961 ion-beam thinning of frozen-hydrated biological specimens for cryo-electron  
962 microscopy. *Nat. Methods* 4, 215–217.  
963

- 964 Mastrorade, D.N. (2005). Automated electron microscope tomography using  
965 robust prediction of specimen movements. *J. Struct. Biol.* 152, 36–51. 1051
- 966
- 967 Mederacke, I., Dapito, D.H., Affò, S., Uchinami, H., and Schwabe, R.F. (2015).  
968 High-yield and high-purity isolation of hepatic stellate cells from normal and fibrotic  
969 mouse livers. *Nat. Protoc.* 10, 305–315. 1052
- 970
- 971 Mitchell, D.R. (2017). Evolution of cilia. *Cold Spring Harb. Perspect. Biol.* 9. 1053
- 972
- 973 Miyata, H., Satouh, Y., Mashiko, D., Muto, M., Nozawa, K., Shiba, K., Fujihara, Y.,  
974 Isotani, A., Inaba, K., and Ikawa, M. (2015). Sperm calcineurin inhibition prevents  
975 mouse fertility with implications for male contraceptive. *Science.* 350, 442–445. 1054
- 976
- 977 Nicastro, D., Schwartz, C., Pierson, J., Gaudette, R., Porter, M.E., and McIntosh,  
978 J.R. (2006). The molecular architecture of axonemes revealed by cryoelectron  
979 tomography. *Science.* 313, 944–948. 1055
- 980
- 981 Nicastro, D., Fu, X., Heuser, T., Tso, A., Porter, M.E., and Linck, R.W. (2011).  
982 Cryo-electron tomography reveals conserved features of doublet microtubules in  
983 flagella. *Proc. Natl. Acad. Sci.* 108, E845–E853. 1056
- 984
- 985 Ounjai, P., Kim, K.D., Lishko, P. V, and Downing, K.H. (2012). Three-Dimensional  
986 Structure of the Bovine Sperm Connecting Piece Revealed by Electron Cryo-  
987 tomography. *Biol. Reprod.* 87, 73. 1057
- 988
- 989 Owa, M., Uchihashi, T., Yanagisawa, H. aki, Yamano, T., Iguchi, H., Fukuzawa,  
990 H., Wakabayashi, K. ichi, Ando, T., and Kikkawa, M. (2019). Inner lumen proteins  
991 stabilize doublet microtubules in cilia and flagella. *Nat. Commun.* 10, 1143. 1058
- 992
- 993 Pampaloni, F., Lattanzi, G., Jonáš, A., Surrey, T., Frey, E., and Florin, E.L.  
994 (2006). Thermal fluctuations of grafted microtubules provide evidence of a  
995 length-dependent persistence length. *Proc. Natl. Acad. Sci. U. S. A.* 103,  
996 10248–10253. 1059
- 997
- 998 Pettersen, E.F., Goddard, T.D., Huang, C.C., Couch, G.S., Greenblatt, D.M.,  
999 Meng, E.C., and Ferrin, T.E. (2004). UCSF Chimera - A visualization system for  
1000 exploratory research and analysis. *J. Comput. Chem.* 25, 1605–1612. 1060
- 1001
- 1002 Phillips, D.M. (1972). Comparative analysis of mammalian sperm motility. *J. Cell*  
1003 *Biol.* 53, 561–573. 1061
- 1004
- 1005 Pigino, G., Maheshwari, A., Bui, K.H., Shingyoji, C., Kamimura, S., and Ishikawa,  
1006 T. (2012). Comparative structural analysis of eukaryotic flagella and cilia from  
1007 *Chlamydomonas*, *Tetrahymena*, and sea urchins. *J. Struct. Biol.* 178, 199–206. 1062
- 1008
- 1009 Riedel-Kruse, I.H., and Hilfinger, A. (2007). How molecular motors shape the  
1010 flagellar beat. *HFSP J.* 1, 192–208. 1063
- 1011
- 1012 Rigort, A., Bäuerlein, F.J., Villa, E., Eibauer, M., Laugks, T., Baumeister, W., and  
1013 Plitzko, J.M.M. (2012). Focused ion beam micromachining of eukaryotic cells for  
1014 cryoelectron tomography. *Proc. Natl. Acad. Sci. U. S. A.* 109, 4449–4454. 1064
- 1015
- 1016 Saggiorato, G., Alvarez, L., Jikeli, J.F., Kaupp, U.B., Gompper, G., and Elgeti, J.  
1017 (2017). Human sperm steer with second harmonics of the flagellar beat. *Nat.*  
1018 *Commun.* 8. 1065
- 1019
- 1020 San Agustin, J.T., Pazour, G.J., and Witman, G.B. (2015). Intraflagellar transport is  
1021 essential for mammalian spermiogenesis but is absent in mature sperm. *Mol. Biol.*  
1022 *Cell* 26, 4358–4372. 1066
- 1023
- 1024 Schaffer, M., Mahamid, J., Engel, B.D., Laugks, T., Baumeister, W., and Plitzko,  
1025 J.M. (2017). Optimized cryo-focused ion beam sample preparation aimed at in situ  
1026 structural studies of membrane proteins. *J. Struct. Biol.* 197, 73–82. 1067
- 1027
- 1028 Serres, C., Feneux, D., and Jouannet, P. (1986). Abnormal distribution of the  
1029 periaxonemal structures in a human sperm flagellar dyskinesia. *Cell Motil.*  
1030 *Cytoskeleton* 6, 68–76. 1068
- 1031
- 1032 Smith, D.J., Gaffney, E.A., Gadelha, H., Kapur, N., and Kirkman-Brown, J.C. (2009).  
1033 Bend propagation in the flagella of migrating human sperm, and its modulation by  
1034 viscosity. *Cell Motil. Cytoskeleton* 66, 220–236. 1069
- 1035
- 1036 Taute, K.M., Pampaloni, F., Frey, E., and Florin, E.L. (2008). Microtubule dynamics  
1037 depart from the wormlike chain model. *Phys. Rev. Lett.* 100, 1–4. 1070
- 1038
- 1039 Tegenov, D., and Cramer, P. (2019). Real-time cryo-electron microscopy data  
1040 preprocessing with Warp. *Nat. Methods* 16, 1146–1152. 1071
- 1041
- 1042 Tivol, W.F., Briegel, A., and Jensen, G.J. (2008). An Improved Cryogen for Plunge  
1043 Freezing. *Microsc. Microanal.* 14, 375–379. 1072
- 1044
- 1045 Ueno, H., Ishikawa, T., Bui, K.H., Gonda, K., Ishikawa, T., and Yamaguchi,  
1046 T. (2012). Mouse respiratory cilia with the asymmetric axonemal structure on  
1047 sparsely distributed ciliary cells can generate overall directional flow. *Nanomedicine*  
1048 *Nanotechnology, Biol. Med.* 8, 1081–1087. 1073
- 1049
- 1050 Wan, K.Y. (2018). Coordination of eukaryotic cilia and flagella. *Essays Biochem.*  
1051 *62*, 829–838. 1074
- 1052
- 1053 Wolff, G., Limpens, R.W.A.L., Zheng, S., Snijder, E.J., Agard, D.A., Koster, A.J.,  
1054 and Bárcena, M. (2019). Mind the gap: Micro-expansion joints drastically decrease  
1055 the bending of FIB-milled cryo-lamellae. *J. Struct. Biol.* 0–1. 1075
- 1056
- 1057 Woolley, D.M., and Fawcett, D.W. (1973). The degeneration and disappearance of  
1058 the centrioles during the development of the rat spermatozoon. *Anat. Rec.* 177,  
1059 289–301. 1076
- 1060
- 1061 Yamaguchi, H., Oda, T., Kikkawa, M., and Takeda, H. (2018). Systematic studies of  
1062 all PIH proteins in zebrafish reveal their distinct roles in axonemal dynein assembly.  
1063 *Elife* 7, 1–25. 1077
- 1064
- 1065 Zabeo, D., Heumann, J.M., Schwartz, C.L., Suzuki-Shinjo, A., Morgan, G., Widlund,  
1066 P.O., and Höög, J.L. (2018). A lumenal interrupted helix in human sperm tail  
1067 microtubules. *Sci. Rep.* 8, 2727. 1078
- 1068
- 1069 Zabeo, D., Croft, J.T., and Höög, J.L. (2019). Axonemal doublet microtubules can  
1070 split into two complete singlets in human sperm flagellum tips. *FEBS Lett.* 593,  
1071 892–902. 1079
- 1072
- 1073 Zeng, G.L. (2012). A filtered backprojection algorithm with characteristics of the  
1074 iterative landweber algorithm. *Med. Phys.* 39, 603–607. 1080
- 1075
- 1076 Zhao, W., Li, Z., Ping, P., Wang, G., Yuan, X., and Sun, F. (2018). Outer dense fibers  
1077 stabilize the axoneme to maintain sperm motility. *J. Cell. Mol. Med.* 22, 1755–1768.  
1078 1081
- 1079
- 1080 Zheng, S.Q., Palovcak, E., Armache, J.P., Verba, K.A., Cheng, Y., and Agard, D.A.  
1081 (2017). MotionCor2: Anisotropic correction of beam-induced motion for improved  
1082 cryo-electron microscopy. *Nat. Methods* 14, 331–332. 1082
